# Supplementary material for: Prevalence and disease progression of genetically-confirmed facioscapulohumeral muscular dystrophy type 1 (FSHD1) in China between 2001 and 2020: a nationwide population-based study
Source: PubMed Central journal article supplement — Lancet Reg Health West Pac. 2021 Nov 22;18:100323. doi: 10.1016/j.lanwpc.2021.100323 (PMC8671729; doi:10.1016/j.lanwpc.2021.100323), 2021-11-22
Supplement: mmc9.pdf [file mmc9.pdf]

## 神经系统疾病患者标本采集知情同意书

亲爱的患者及亲属朋友，请您仔细阅读本文，欢迎提出问题并与您的家人、朋友或我们讨论。

### 1、为什么要采集标本

在所有人类遗传性疾病中，有60%以上与神经系统有关，特别是近年来分子生物学技术取得了迅猛发展，越来越多的疾病的发病机制从分子生物学水平得以阐明，这为疾病的治疗和预防奠定了基础。而对疾病的分子生物学研究，离不开标本的采集，我们采集患者的血样少数患者需要特殊的标本如少量肌肉标本，我们从这些标本中提取脱氧核糖核酸（DNA）以进行分子生物学研究。

### 2、提供标本对您有何益处？

我们会对您的标本进行分子生物学分析，将有助于对某些疾病作出基因诊断，为您的治疗提供必要的建议，为您的亲属提供遗传咨询，或为疾病的研究提供有益的信息。

### 3、标本如何采集

我们将派出专业人员为您取样，如抽取静脉血2—5毫升，个别患者需抽取10毫升，对于肌肉样本的采集，我们会另外和您沟通。取样过程所采用的器皿均为一次性灭菌物品。

### 4、采集样本有何风险

您的样本采集将严格按照无菌要求操作，所用针头、针管均是一次性合格的医疗用品。样本的采集可能会有一些非常小的风险，包括短暂的疼痛、局部青紫，少数人会有轻度头晕，或极为罕见的针头感染。

### 5、如何保护您的隐私权

我们将对您的标本编号，将您的病情建立档案。我们将会严密保护您的隐私权，除了您本人或直系亲属，我们不会向他人透露您的任何资料。

请仔细阅读以下黑体字部分，并慎重考虑。如果同意，请签名：

**我同意提供样本，供医务人员进行分子生物学研究使用。我已阅读或了解了上述材料内容，并就相关疑问咨询了研究人员。提供样本是我自愿选择，提供样本后将不能取回。**

您的签名：

陈如木

日期：

06.11.8.

## 神经系统疾病患者标本采集知情同意书

亲爱的患者及亲属朋友，请您仔细阅读本文，欢迎提出问题并与您的家人、朋友或我们讨论。

### 1、为什么要采集标本

在所有人类遗传性疾病中，有60%以上与神经系统有关，特别是近年来分子生物学技术取得了迅猛发展，越来越多的疾病的发病机制从分子生物学水平得以阐明，这为疾病的治疗和预防奠定了基础。而对疾病的分子生物学研究，离不开标本的采集，我们采集患者的血样少数患者需要特殊的标本如少量肌肉标本，我们从这些标本中提取脱氧核糖核酸（DNA）以进行分子生物学研究。

### 2、提供标本对您有何益处？

我们会对您的标本进行分子生物学分析，将有助于对某些疾病作出基因诊断，为您的治疗提供必要的建议，为您的亲属提供遗传咨询，或为疾病的研究提供有益的信息。

### 3、标本如何采集

我们将派出专业人员为您取样，如抽取静脉血2—5毫升，个别患者需抽取10毫升，对于肌肉样本的采集，我们会另外和您沟通。取样过程所采用的器皿均为一次性灭菌物品。

### 4、采集样本有何风险

您的样本采集将严格按照无菌要求操作，所用针头、针管均是一次性合格的医疗用品。样本的采集可能会有一些非常小的风险，包括短暂的疼痛、局部青紫，少数人会有轻度头晕，或极为罕见的针头感染。

### 5、如何保护您的隐私权

我们将对您的标本编号，将您的病情建立档案。我们将会严密保护您的隐私权，除了您本人或直系亲属，我们不会向他人透露您的任何资料。请仔细阅读以下黑体字部分，并慎重考虑。如果同意，请签名：

**我同意提供样本，供医务人员进行分子生物学研究使用。我已阅读或了解了上述材料内容，并就相关疑问咨询了研究人员。提供样本是我自愿选择，提供样本后将不能取回。**

您的签名：



日期：

2002.6.1



## 神经系统疾病患者标本采集知情同意书

1437

亲爱的患者及亲属朋友，请您仔细阅读本文，欢迎提出问题并与您的家人、朋友或我们讨论。

### 1、为什么要采集标本

在所有人类遗传性疾病中，有60%以上与神经系统有关，特别是近年来分子生物学技术取得了迅猛发展，越来越多的疾病的发病机制从分子生物学水平得以阐明，这为疾病的治疗和预防奠定了基础。而对疾病的分子生物学研究，离不开标本的采集，我们采集患者的血样少数患者需要特殊的标本如少量肌肉标本，我们从这些标本中提取脱氧核糖核酸（DNA）以进行分子生物学研究。

### 2、提供标本对您有何益处？

我们会对您的标本进行分子生物学分析，将有助于对某些疾病作出基因诊断，为您的治疗提供必要的建议，为您的亲属提供遗传咨询，或为疾病的研究提供有益的信息。

### 3、标本如何采集

我们将派出专业人员为您取样，如抽取静脉血2—5毫升，个别患者需抽取10毫升，对于肌肉样本的采集，我们会另外和您沟通。取样过程所采用的器皿均为一次性灭菌物品。

### 4、采集样本有何风险

您的样本采集将严格按照无菌要求操作，所用针头、针管均是一次性合格的医疗用品。样本的采集可能会有一些非常小的风险，包括短暂的疼痛、局部青紫，少数人会有轻度头晕，或极为罕见的针头感染。

### 5、如何保护您的隐私权

我们将对您的标本编号，将您的病情建立档案。我们将会严密保护您的隐私权，除了您本人或直系亲属，我们不会向他人透露您的任何资料。

请仔细阅读以下黑体字部分，并慎重考虑。如果同意，请签名：

**我同意提供样本，供医务人员进行分子生物学研究使用。我已阅读或了解了上述材料内容，并就相关疑问咨询了研究人员。提供样本是我自愿选择，提供样本后将不能取回。**

您的签名：

苏小秋

日期：

2009.3.19.

## 神经系统疾病患者标本采集知情同意书

亲爱的患者及亲属朋友，请您仔细阅读本文，欢迎提出问题并与您的家人、朋友或我们讨论。

### 1、为什么要采集标本

在所有人类遗传性疾病中，有60%以上与神经系统有关，特别是近年来分子生物学技术取得了迅猛发展，越来越多的疾病的发病机制从分子生物学水平得以阐明，这为疾病的治疗和预防奠定了基础。而对疾病的分子生物学研究，离不开标本的采集，我们采集患者的血样少数患者需要特殊的标本如少量肌肉标本，我们从这些标本中提取脱氧核糖核酸（DNA）以进行分子生物学研究。

### 2、提供标本对您有何益处？

我们会对您的标本进行分子生物学分析，将有助于对某些疾病作出基因诊断，为您的治疗提供必要的建议，为您的亲属提供遗传咨询，或为疾病的研究提供有益的信息。

### 3、标本如何采集

我们将派出专业人员为您取样，如抽取静脉血2—5毫升，个别患者需抽取10毫升，对于肌肉样本的采集，我们会另外和您沟通。取样过程所采用的器皿均为一次性灭菌物品。

### 4、采集样本有何风险

您的样本采集将严格按照无菌要求操作，所用针头、针管均是一次性合格的医疗用品。样本的采集可能会有一些非常小的风险，包括短暂的疼痛、局部青紫，少数人会有轻度头晕，或极为罕见的针头感染。

### 5、如何保护您的隐私权

我们将对您的标本编号，将您的病情建立档案。我们将会严密保护您的隐私权，除了您本人或直系亲属，我们不会向他人透露您的任何资料。

请仔细阅读以下黑体字部分，并慎重考虑。如果同意，请签名：

**我同意提供样本，供医务人员进行分子生物学研究使用。我已阅读或了解了上述材料内容，并就相关疑问咨询了研究人员。提供样本是我自愿选择，提供样本后将不能取回。另外，我要求将基因分析结果告知我本人。**

您的签名：

曹繁洁  
曹晓霞

日期：

2010.12.9

1480

### 神经系统疾病患者标本采集知情同意书

亲爱的患者及亲属朋友，请您仔细阅读本文，欢迎提出问题并与您的家人、朋友或我们讨论。

#### 1、为什么要采集标本

在所有人类遗传性疾病中，有60%以上与神经系统有关，特别是近年来分子生物学技术取得了迅猛发展，越来越多的疾病的发病机制从分子生物学水平得以阐明，这为疾病的治疗和预防奠定了基础。而对疾病的分子生物学研究，离不开标本的采集，我们采集患者的血样少数患者需要特殊的标本如少量肌肉标本，我们从这些标本中提取脱氧核糖核酸（DNA）以进行分子生物学研究。

#### 2、提供标本对您有何益处？

我们会对您的标本进行分子生物学分析，将有助于对某些疾病作出基因诊断，为您的治疗提供必要的建议，为您的亲属提供遗传咨询，或为疾病的研究提供有益的信息。

#### 3、标本如何采集

我们将派出专业人员为您取样，如抽取静脉血2—5毫升，个别患者需抽取10毫升，对于肌肉样本的采集，我们会另外和您沟通。取样过程所采用的器皿均为一次性灭菌物品。

#### 4、采集样本有何风险

您的样本采集将严格按照无菌要求操作，所用针头、针管均是一次性合格的医疗用品。样本的采集可能会有一些非常小的风险，包括短暂的疼痛、局部青紫，少数人会有轻度头晕，或极为罕见的针头感染。

#### 5、如何保护您的隐私权

我们将对您的标本编号，将您的病情建立档案。我们将会严密保护您的隐私权，除了您本人或直系亲属，我们不会向他人透露您的任何资料。

请仔细阅读以下黑体字部分，并慎重考虑。如果同意，请签名：

**我同意提供样本，供医务人员进行分子生物学研究使用。我已阅读或了解了上述材料内容，并就相关疑问咨询了研究人员。提供样本是我自愿选择，提供样本后将不能取回。**

您的签名：

林化真

日期：

2003.8.6

1572

## 神经系统疾病患者标本采集知情同意书

亲爱的患者及亲属朋友，请您仔细阅读本文，欢迎提出问题并与您的家人、朋友或我们讨论。

### 1、为什么要采集标本

在所有人类遗传性疾病中，有60%以上与神经系统有关，特别是近年来分子生物学技术取得了迅猛发展，越来越多的疾病的发病机制从分子生物学水平得以阐明，这为疾病的治疗和预防奠定了基础。而对疾病的分子生物学研究，离不开标本的采集，我们采集患者的血样少数患者需要特殊的标本如少量肌肉标本，我们从这些标本中提取脱氧核糖核酸（DNA）以进行分子生物学研究。

### 2、提供标本对您有何益处？

我们会对您的标本进行分子生物学分析，将有助于对某些疾病作出基因诊断，为您的治疗提供必要的建议，为您的亲属提供遗传咨询，或为疾病的研究提供有益的信息。

### 3、标本如何采集

我们将派出专业人员为您取样，如抽取静脉血2—5毫升，个别患者需抽取10毫升，对于肌肉样本的采集，我们会另外和您沟通。取样过程所采用的器皿均为一次性灭菌物品。

### 4、采集样本有何风险

您的样本采集将严格按照无菌要求操作，所用针头、针管均是一次性合格的医疗用品。样本的采集可能会有一些非常小的风险，包括短暂的疼痛、局部青紫，少数人会有轻度头晕，或极为罕见的针头感染。

### 5、如何保护您的隐私权

我们将对您的标本编号，将您的病情建立档案。我们将会严密保护您的隐私权，除了您本人或直系亲属，我们不会向他人透露您的任何资料。请仔细阅读以下黑体字部分，并慎重考虑。如果同意，请签名：

**我同意提供样本，供医务人员进行分子生物学研究使用。我已阅读或了解了上述材料内容，并就相关疑问咨询了研究人员。提供样本是我自愿选择，提供样本后将不能取回。**

您的签名：

林建国

日期：

2004.3.25

1637

## 神经系统疾病患者标本采集知情同意书

亲爱的患者及亲属朋友，请您仔细阅读本文，欢迎提出问题并与您的家人、朋友或我们讨论。

### 1、为什么要采集标本

在所有人类遗传性疾病中，有60%以上与神经系统有关，特别是近年来分子生物学技术取得了迅猛发展，越来越多的疾病的发病机制从分子生物学水平得以阐明，这为疾病的治疗和预防奠定了基础。而对疾病的分子生物学研究，离不开标本的采集，我们采集患者的血样少数患者需要特殊的标本如少量肌肉标本，我们从这些标本中提取脱氧核糖核酸（DNA）以进行分子生物学研究。

### 2、提供标本对您有何益处？

我们会对您的标本进行分子生物学分析，将有助于对某些疾病作出基因诊断，为您的治疗提供必要的建议，为您的亲属提供遗传咨询，或为疾病的研究提供有益的信息。

### 3、标本如何采集

我们将派出专业人员为您取样，如抽取静脉血2—5毫升，个别患者需抽取10毫升，对于肌肉样本的采集，我们会另外和您沟通。取样过程所采用的器皿均为一次性灭菌物品。

### 4、采集样本有何风险

您的样本采集将严格按照无菌要求操作，所用针头、针管均是一次性合格的医疗用品。样本的采集可能会有一些非常小的风险，包括短暂的疼痛、局部青紫，少数人会有轻度头晕，或极为罕见的针头感染。

### 5、如何保护您的隐私权

我们将对您的标本编号，将您的病情建立档案。我们将会严密保护您的隐私权，除了您本人或直系亲属，我们不会向他人透露您的任何资料。

请仔细阅读以下黑体字部分，并慎重考虑。如果同意，请签名：

**我同意提供样本，供医务人员进行分子生物学研究使用。我已阅读或了解了上述材料内容，并就相关疑问咨询了研究人员。提供样本是我自愿选择，提供样本后将不能取回。另外，我要求将基因分析结果告知我本人。**

您的签名：

林忠立

日期：

2012.05.17

随访

DNA: 1782

### 神经系统疾病患者标本采集知情同意书

亲爱的患者及亲属朋友，请您仔细阅读本文，欢迎提出问题并与您的家人、朋友或我们讨论。

#### 1、为什么要采集标本

在所有人类遗传性疾病中，有60%以上与神经系统有关，特别是近年来分子生物学技术取得了迅猛发展，越来越多的疾病的发病机制从分子生物学水平得以阐明，这为疾病的治疗和预防奠定了基础。而对疾病的分子生物学研究，离不开标本的采集，我们采集患者的血样少数患者需要特殊的标本如少量肌肉标本，我们从这些标本中提取脱氧核糖核酸（DNA）以进行分子生物学研究。

#### 2、提供标本对您有何益处？

我们会对您的标本进行分子生物学分析，将有助于对某些疾病作出基因诊断，为您的治疗提供必要的建议，为您的亲属提供遗传咨询，或为疾病的研究提供有益的信息。

#### 3、标本如何采集

我们将派出专业人员为您取样，如抽取静脉血2—5毫升，个别患者需抽取10毫升，对于肌肉样本的采集，我们会另外和您沟通。取样过程所采用的器皿均为一次性灭菌物品。

#### 4、采集样本有何风险

您的样本采集将严格按照无菌要求操作，所用针头、针管均是一次性合格的医疗用品。样本的采集可能会有一些非常小的风险，包括短暂的疼痛、局部青紫，少数人会有轻度头晕，或极为罕见的针头感染。

#### 5、如何保护您的隐私权

我们将对您的标本编号，将您的病情建立档案。我们将会严密保护您的隐私权，除了您本人或直系亲属，我们不会向他人透露您的任何资料。请仔细阅读以下黑体字部分，并慎重考虑。如果同意，请签名：

**我同意提供样本，供医务人员进行分子生物学研究使用。我已阅读或了解了上述材料内容，并就相关疑问咨询了研究人员。提供样本是我自愿选择，提供样本后将不能取回。**

您的签名：

林志群

日期：

2004.12.02

1876

## 神经系统疾病患者标本采集知情同意书

亲爱的患者及亲属朋友，请您仔细阅读本文，欢迎提出问题并与您的家人、朋友或我们讨论。

### 1、为什么要采集标本

在所有人类遗传性疾病中，有60%以上与神经系统有关，特别是近年来分子生物学技术取得了迅猛发展，越来越多的疾病的发病机制从分子生物学水平得以阐明，这为疾病的治疗和预防奠定了基础。而对疾病的分子生物学研究，离不开标本的采集，我们采集患者的血样少数患者需要特殊的标本如少量肌肉标本，我们从这些标本中提取脱氧核糖核酸（DNA）以进行分子生物学研究。

### 2、提供标本对您有何益处？

我们会对您的标本进行分子生物学分析，将有助于对某些疾病作出基因诊断，为您的治疗提供必要的建议，为您的亲属提供遗传咨询，或为疾病的研究提供有益的信息。

### 3、标本如何采集

我们将派出专业人员为您取样，如抽取静脉血2—5毫升，个别患者需抽取10毫升，对于肌肉样本的采集，我们会另外和您沟通。取样过程所采用的器皿均为一次性灭菌物品。

### 4、采集样本有何风险

您的样本采集将严格按照无菌要求操作，所用针头、针管均是一次性合格的医疗用品。样本的采集可能会有些非常小的风险，包括短暂的疼痛、局部青紫，少数人会有轻度头晕，或极为罕见的针头感染。

### 5、如何保护您的隐私权

我们将对您的标本编号，将您的病情建立档案。我们将会严密保护您的隐私权，除了您本人或直系亲属，我们不会向他人透露您的任何资料。请仔细阅读以下黑体字部分，并慎重考虑。如果同意，请签名：

**我同意提供样本，供医务人员进行分子生物学研究使用。我已阅读或了解了上述材料内容，并就相关疑问咨询了研究人员。提供样本是我自愿选择，提供样本后将不能取回。**

您的签名：

吴柳青

日期：

2005.4.27



## 神经系统疾病患者标本采集知情同意书

亲爱的患者及亲属朋友，请您仔细阅读本文，欢迎提出问题并与您的家人、朋友或我们讨论。

### 1、为什么要采集标本

在所有人类遗传性疾病中，有60%以上与神经系统有关，特别是近年来分子生物学技术取得了迅猛发展，越来越多的疾病的发病机制从分子生物学水平得以阐明，这为疾病的治疗和预防奠定了基础。而对疾病的分子生物学研究，离不开标本的采集，我们采集患者的血样少数患者需要特殊的标本如少量肌肉标本，我们从这些标本中提取脱氧核糖核酸（DNA）以进行分子生物学研究。

### 2、提供标本对您有何益处？

我们会对您的标本进行分子生物学分析，将有助于对某些疾病作出基因诊断，为您的治疗提供必要的建议，为您的亲属提供遗传咨询，或为疾病的研究提供有益的信息。

### 3、标本如何采集

我们将派出专业人员为您取样，如抽取静脉血2—5毫升，个别患者需抽取10毫升。对于肌肉样本的采集，我们会另外和您沟通。取样过程所采用的器皿均为一次性灭菌物品。

### 4、采集样本有何风险

您的样本采集将严格按照无菌要求操作，所用针头、针管均是一次性合格的医疗用品。样本的采集可能会有一些非常小的风险，包括短暂的疼痛、局部青紫，少数人会有轻度头晕，或极为罕见的针头感染。

### 5、如何保护您的隐私权

我们将对您的标本编号，将您的病情建立档案。我们将会严密保护您的隐私权，除了您本人或直系亲属，我们不会向他人透露您的任何资料。

请仔细阅读以下黑体字部分，并慎重考虑。如果同意，请签名：

**我同意提供样本，供医务人员进行分子生物学研究使用。我已阅读或了解了上述材料内容，并就相关疑问咨询了研究人员。提供样本是我自愿选择，提供样本后将不能取回。另外，我要求将基因分析结果告知我本人。**

您的签名： 郝瑞瑞

日期： 2016.7.06 随访

家属签名： \_\_\_\_\_（关系： \_\_\_\_\_） 日期： \_\_\_\_\_

备注： 1. 签字或按手印。  
2. 儿童或无能力签字者，请由监护人或家属代签，并注明关系。



2271

## 神经系统疾病患者标本采集知情同意书

亲爱的患者及亲属朋友，请您仔细阅读本文，欢迎提出问题并与您的家人、朋友或我们讨论。

### 1、为什么要采集标本

在所有人类遗传性疾病中，有60%以上与神经系统有关，特别是近年来分子生物学技术取得了迅猛发展，越来越多的疾病的发病机制从分子生物学水平得以阐明，这为疾病的治疗和预防奠定了基础。而对疾病的分子生物学研究，离不开标本的采集，我们采集患者的血样少数患者需要特殊的标本如少量肌肉标本，我们从这些标本中提取脱氧核糖核酸（DNA）以进行分子生物学研究。

### 2、提供标本对您有何益处？

我们会对您的标本进行分子生物学分析，将有助于对某些疾病作出基因诊断，为您的治疗提供必要的建议，为您的亲属提供遗传咨询，或为疾病的研究提供有益的信息。

### 3、标本如何采集

我们将派出专业人员为您取样，如抽取静脉血2—5毫升，个别患者需抽取10毫升，对于肌肉样本的采集，我们会另外和您沟通。取样过程所采用的器皿均为一次性灭菌物品。

### 4、采集样本有何风险

您的样本采集将严格按照无菌要求操作，所用针头、针管均是一次性合格的医疗用品。样本的采集可能会有一些非常小的风险，包括短暂的疼痛、局部青紫，少数人会有轻度头晕，或极为罕见的针头感染。

### 5、如何保护您的隐私权

我们将对您的标本编号，将您的病情建立档案。我们将会严密保护您的隐私权，除了您本人或直系亲属，我们不会向他人透露您的任何资料。

请仔细阅读以下黑体字部分，并慎重考虑。如果同意，请签名：

**我同意提供样本，供医务人员进行分子生物学研究使用。我已阅读或了解了上述材料内容，并就相关疑问咨询了研究人员。提供样本是我自愿选择，提供样本后将不能取回。**

您的签名：

纪德亮

日期：

2005.11.27

## 神经系统疾病患者标本采集知情同意书

亲爱的患者及亲属朋友，请您仔细阅读本文，欢迎提出问题并与您的家人、朋友或我们讨论。

### 1、为什么要采集标本

在所有人类遗传性疾病中，有60%以上与神经系统有关，特别是近年来分子生物学技术取得了迅猛发展，越来越多的疾病的发病机制从分子生物学水平得以阐明，这为疾病的治疗和预防奠定了基础。而对疾病的分子生物学研究，离不开标本的采集，我们采集患者的血样少数患者需要特殊的标本如少量肌肉标本，我们从这些标本中提取脱氧核糖核酸（DNA）以进行分子生物学研究。

### 2、提供标本对您有何益处？

我们会对您的标本进行分子生物学分析，将有助于对某些疾病作出基因诊断，为您的治疗提供必要的建议，为您的亲属提供遗传咨询，或为疾病的研究提供有益的信息。

### 3、标本如何采集

我们将派出专业人员为您取样，如抽取静脉血2—5毫升，个别患者需抽取10毫升，对于肌肉样本的采集，我们会另外和您沟通。取样过程所采用的器皿均为一次性灭菌物品。

### 4、采集样本有何风险

您的样本采集将严格按照无菌要求操作，所用针头、针管均是一次性合格的医疗用品。样本的采集可能会有一些非常小的风险，包括短暂的疼痛、局部青紫，少数人会有轻度头晕，或极为罕见的针头感染。

### 5、如何保护您的隐私权

我们将对您的标本编号，将您的病情建立档案。我们将会严密保护您的隐私权，除了您本人或直系亲属，我们不会向他人透露您的任何资料。

请仔细阅读以下黑体字部分，并慎重考虑。如果同意，请签名：

**我同意提供样本，供医务人员进行分子生物学研究使用。我已阅读或了解了上述材料内容，并就相关疑问咨询了研究人员。提供样本是我自愿选择，提供样本后将不能取回。**

您的签名：

冯宋岳

日期：

2006-2-15

## 神经系统疾病患者标本采集知情同意书

23/2

亲爱的患者及亲属朋友，请您仔细阅读本文，欢迎提出问题并与您的家人、朋友或我们讨论。

### 1、为什么要采集标本

在所有人类遗传性疾病中，有60%以上与神经系统有关，特别是近年来分子生物学技术取得了迅猛发展，越来越多的疾病的发病机制从分子生物学水平得以阐明，这为疾病的治疗和预防奠定了基础。而对疾病的分子生物学研究，离不开标本的采集，我们采集患者的血样少数患者需要特殊的标本如少量肌肉标本，我们从这些标本中提取脱氧核糖核酸（DNA）以进行分子生物学研究。

### 2、提供标本对您有何益处？

我们会对您的标本进行分子生物学分析，将有助于对某些疾病作出基因诊断，为您的治疗提供必要的建议，为您的亲属提供遗传咨询，或为疾病的研究提供有益的信息。

### 3、标本如何采集

我们将派出专业人员为您取样，如抽取静脉血2—5毫升，个别患者需抽取10毫升，对于肌肉样本的采集，我们会另外和您沟通。取样过程所采用的器皿均为一次性灭菌物品。

### 4、采集样本有何风险

您的样本采集将严格按照无菌要求操作，所用针头、针管均是一次性合格的医疗用品。样本的采集可能会有一些非常小的风险，包括短暂的疼痛、局部青紫，少数人会有轻度头晕，或极为罕见的针头感染。

### 5、如何保护您的隐私权

我们将对您的标本编号，将您的病情建立档案。我们将会严密保护您的隐私权，除了您本人或直系亲属，我们不会向他人透露您的任何资料。

请仔细阅读以下黑体字部分，并慎重考虑。如果同意，请签名：

**我同意提供样本，供医务人员进行分子生物学研究使用。我已阅读或了解了上述材料内容，并就相关疑问咨询了研究人员。提供样本是我自愿选择，提供样本后将不能取回。另外，我要求将基因分析结果告知我本人。**

您的签名：

杨辉

日期：

2011.07.15

## 神经系统疾病患者标本采集知情同意书

亲爱的患者及亲属朋友，请您仔细阅读本文，欢迎提出问题并与您的家人、朋友或我们讨论。

### 1、为什么要采集标本

在所有人类遗传性疾病中，有60%以上与神经系统有关，特别是近年来分子生物学技术取得了迅猛发展，越来越多的疾病的发病机制从分子生物学水平得以阐明，这为疾病的治疗和预防奠定了基础。而对疾病的分子生物学研究，离不开标本的采集，我们采集患者的血样少数患者需要特殊的标本如少量肌肉标本，我们从这些标本中提取脱氧核糖核酸（DNA）以进行分子生物学研究。

### 2、提供标本对您有何益处？

我们会对您的标本进行分子生物学分析，将有助于对某些疾病作出基因诊断，为您的治疗提供必要的建议，为您的亲属提供遗传咨询，或为疾病的研究提供有益的信息。

### 3、标本如何采集

我们将派出专业人员为您取样，如抽取静脉血2—5毫升，个别患者需抽取10毫升，对于肌肉样本的采集，我们会另外和您沟通。取样过程所采用的器皿均为一次性灭菌物品。

### 4、采集样本有何风险

您的样本采集将严格按照无菌要求操作，所用针头、针管均是一次性合格的医疗用品。样本的采集可能会有一些非常小的风险，包括短暂的疼痛、局部青紫，少数人会有轻度头晕，或极为罕见的针头感染。

### 5、如何保护您的隐私权

我们将对您的标本编号，将您的病情建立档案。我们将会严密保护您的隐私权，除了您本人或直系亲属，我们不会向他人透露您的任何资料。

请仔细阅读以下黑体字部分，并慎重考虑。如果同意，请签名：

**我同意提供样本，供医务人员进行分子生物学研究使用。我已阅读或了解了上述材料内容，并就相关疑问咨询了研究人员。提供样本是我自愿选择，提供样本后将不能取回。**

您的签名：

曹春萍

日期：

06-7-5

## 神经系统疾病患者标本采集知情同意书

4132

亲爱的患者及亲属朋友，请您仔细阅读本文，欢迎提出问题并与您的家人、朋友或我们讨论。

### 1、为什么要采集标本

在所有人类遗传性疾病中，有60%以上与神经系统有关，特别是近年来分子生物学技术取得了迅猛发展，越来越多的疾病的发病机制从分子生物学水平得以阐明，这为疾病的治疗和预防奠定了基础。而对疾病的分子生物学研究，离不开标本的采集，我们采集患者的血样少数患者需要特殊的标本如少量肌肉标本。我们从这些标本中提取脱氧核糖核酸（DNA）以进行分子生物学研究。

### 2、提供标本对您有何益处？

我们会对您的标本进行分子生物学分析，将有助于对某些疾病作出基因诊断，为您的治疗提供必要的建议，为您的亲属提供遗传咨询，或为疾病的研究提供有益的信息。

### 3、标本如何采集

我们将派出专业人员为您取样，如抽取静脉血2—5毫升，个别患者需抽取10毫升，对于肌肉样本的采集，我们会另外和您沟通。取样过程所采用的器皿均为一次性灭菌物品。

### 4、采集样本有何风险

您的样本采集将严格按照无菌要求操作，所用针头、针管均是一次性合格的医疗用品。样本的采集可能会有一些非常小的风险，包括短暂的疼痛、局部青紫，少数人会有轻度头晕，或极为罕见的针头感染。

### 5、如何保护您的隐私权

我们将对您的标本编号，将您的病情建立档案。我们将会严密保护您的隐私权，除了您本人或直系亲属，我们不会向他人透露您的任何资料。

请仔细阅读以下黑体字部分，并慎重考虑。如果同意，请签名：

**我同意提供样本，供医务人员进行分子生物学研究使用。我已阅读或了解了上述材料内容，并就相关疑问咨询了研究人员。提供样本是我自愿选择，提供样本后将不能取回。**

您的签名：

俞水娇

日期：

2007.10.7

## 神经系统疾病患者标本采集知情同意书

4130

亲爱的患者及亲属朋友，请您仔细阅读本文，欢迎提出问题并与您的家人、朋友或我们讨论。

### 1、为什么要采集标本

在所有人类遗传性疾病中，有 60%以上与神经系统有关，特别是近年来分子生物学技术取得了迅猛发展，越来越多的疾病的发病机制从分子生物学水平得以阐明，这为疾病的治疗和预防奠定了基础。而对疾病的分子生物学研究，离不开标本的采集，我们采集患者的血样少数患者需要特殊的标本如少量肌肉标本，我们从这些标本中提取脱氧核糖核酸（DNA）以进行分子生物学研究。

### 2、提供标本对您有何益处？

我们会对您的标本进行分子生物学分析，将有助于对某些疾病作出基因诊断，为您的治疗提供必要的建议，为您的亲属提供遗传咨询，或为疾病的研究提供有益的信息。

### 3、标本如何采集

我们将派出专业人员为您取样，如抽取静脉血 2—5 毫升，个别患者需抽取 10 毫升，对于肌肉样本的采集，我们会另外和您沟通。取样过程所采用的器皿均为一次性灭菌物品。

### 4、采集样本有何风险

您的样本采集将严格按照无菌要求操作，所用针头、针管均是一次性合格的医疗用品。样本的采集可能会有一些非常小的风险，包括短暂的疼痛、局部青紫，少数人会有轻度头晕，或极为罕见的针头感染。

### 5、如何保护您的隐私权

我们将对您的标本编号，将您的病情建立档案。我们将会严密保护您的隐私权，除了您本人或直系亲属，我们不会向他人透露您的任何资料。

请仔细阅读以下黑体字部分，并慎重考虑。如果同意，请签名：

**我同意提供样本，供医务人员进行分子生物学研究使用。我已阅读或了解了上述材料内容，并就相关疑问咨询了研究人员。提供样本是我自愿选择，提供样本后将不能取回。**

您的签名：

陈小平

日期：

2007.10.7



## 神经系统疾病患者标本采集知情同意书

4131

亲爱的患者及亲属朋友，请您仔细阅读本文，欢迎提出问题并与您的家人、朋友或我们讨论。

### 1、为什么要采集标本

在所有人类遗传性疾病中，有60%以上与神经系统有关，特别是近年来分子生物学技术取得了迅猛发展，越来越多的疾病的发病机制从分子生物学水平得以阐明，这为疾病的治疗和预防奠定了基础。而对疾病的分子生物学研究，离不开标本的采集，我们采集患者的血样少数患者需要特殊的标本如少量肌肉标本，我们从这些标本中提取脱氧核糖核酸（DNA）以进行分子生物学研究。

### 2、提供标本对您有何益处？

我们会对您的标本进行分子生物学分析，将有助于对某些疾病作出基因诊断，为您的治疗提供必要的建议，为您的亲属提供遗传咨询，或为疾病的研究提供有益的信息。

### 3、标本如何采集

我们将派出专业人员为您取样，如抽取静脉血2—5毫升，个别患者需抽取10毫升，对于肌肉样本的采集，我们会另外和您沟通。取样过程所采用的器皿均为一次性灭菌物品。

### 4、采集样本有何风险

您的样本采集将严格按照无菌要求操作，所用针头、针管均是一次性合格的医疗用品。样本的采集可能会有一些非常小的风险，包括短暂的疼痛、局部青紫，少数人会有轻度头晕，或极为罕见的针头感染。

### 5、如何保护您的隐私权

我们将对您的标本编号，将您的病情建立档案。我们将会严密保护您的隐私权，除了您本人或直系亲属，我们不会向他人透露您的任何资料。

请仔细阅读以下黑体字部分，并慎重考虑。如果同意，请签名：

**我同意提供样本，供医务人员进行分子生物学研究使用。我已阅读或了解了上述材料内容，并就相关疑问咨询了研究人员。提供样本是我自愿选择，提供样本后将不能取回。**

您的签名：

陈伟峰

日期：

2007.10.7.

## 神经系统疾病患者标本采集知情同意书

7685

亲爱的患者及亲属朋友，请您仔细阅读本文，欢迎提出问题并与您的家人、朋友或我们讨论。

### 1、为什么要采集标本

在所有人类遗传性疾病中，有 60%以上与神经系统有关，特别是近年来分子生物学技术取得了迅猛发展，越来越多的疾病的发病机制从分子生物学水平得以阐明，这为疾病的治疗和预防奠定了基础。而对疾病的分子生物学研究，离不开标本的采集，我们采集患者的血样少数患者需要特殊的标本如少量肌肉标本，我们从这些标本中提取脱氧核糖核酸（DNA）以进行分子生物学研究。

### 2、提供标本对您有何益处？

我们会对您的标本进行分子生物学分析，将有助于对某些疾病作出基因诊断，为您的治疗提供必要的建议，为您的亲属提供遗传咨询，或为疾病的研究提供有益的信息。

### 3、标本如何采集

我们将派出专业人员为您取样，如抽取静脉血 2—5 毫升，个别患者需抽取 10 毫升，对于肌肉样本的采集，我们会另外和您沟通。取样过程所采用的器皿均为一次性灭菌物品。

### 4、采集样本有何风险

您的样本采集将严格按照无菌要求操作，所用针头、针管均是一次性合格的医疗用品。样本的采集可能会有一些非常小的风险，包括短暂的疼痛、局部青紫，少数人会有轻度头晕，或极为罕见的针头感染。

### 5、如何保护您的隐私权

我们将对您的标本编号，将您的病情建立档案。我们将会严密保护您的隐私权，除了您本人或直系亲属，我们不会向他人透露您的任何资料。

请仔细阅读以下黑体字部分，并慎重考虑。如果同意，请签名：

**我同意提供样本，供医务人员进行分子生物学研究使用。我已阅读或了解了上述材料内容，并就相关疑问咨询了研究人员。提供样本是我自愿选择，提供样本后将不能取回。**

您的签名：



日期：

07.5.7.



## 神经系统疾病患者标本采集知情同意书

5305

亲爱的患者及亲属朋友，请您仔细阅读本文，欢迎提出问题并与您的家人、朋友或我们讨论。

### 1、为什么要采集标本

在所有人类遗传性疾病中，有60%以上与神经系统有关，特别是近年来分子生物学技术取得了迅猛发展，越来越多的疾病的发病机制从分子生物学水平得以阐明，这为疾病的治疗和预防奠定了基础。而对疾病的分子生物学研究，离不开标本的采集，我们采集患者的血样少数患者需要特殊的标本如少量肌肉标本，我们从这些标本中提取脱氧核糖核酸（DNA）以进行分子生物学研究。

### 2、提供标本对您有何益处？

我们会对您的标本进行分子生物学分析，将有助于对某些疾病作出基因诊断，为您的治疗提供必要的建议，为您的亲属提供遗传咨询，或为疾病的研究提供有益的信息。

### 3、标本如何采集

我们将派出专业人员为您取样，如抽取静脉血2—5毫升，个别患者需抽取10毫升，对于肌肉样本的采集，我们会另外和您沟通。取样过程所采用的器皿均为一次性灭菌物品。

### 4、采集样本有何风险

您的样本采集将严格按照无菌要求操作，所用针头、针管均是一次性合格的医疗用品。样本的采集可能会有一些非常小的风险，包括短暂的疼痛、局部青紫，少数人会有轻度头晕，或极为罕见的针头感染。

### 5、如何保护您的隐私权

我们将对您的标本编号，将您的病情建立档案。我们将会严密保护您的隐私权，除了您本人或直系亲属，我们不会向他人透露您的任何资料。

请仔细阅读以下黑体字部分，并慎重考虑。如果同意，请签名：

**我同意提供样本，供医务人员进行分子生物学研究使用。我已阅读或了解了上述材料内容，并就相关疑问咨询了研究人员。提供样本是我自愿选择，提供样本后将不能取回。**

您的签名：

林燕芳

日期：

2008.10.10

4854

## 神经系统疾病患者标本采集知情同意书

亲爱的患者及亲属朋友，请您仔细阅读本文，欢迎提出问题并与您的家人、朋友或我们讨论。

### 1、为什么要采集标本

在所有人类遗传性疾病中，有60%以上与神经系统有关，特别是近年来分子生物学技术取得了迅猛发展，越来越多的疾病的发病机制从分子生物学水平得以阐明，这为疾病的治疗和预防奠定了基础。而对疾病的分子生物学研究，离不开标本的采集，我们采集患者的血样少数患者需要特殊的标本如少量肌肉标本，我们从这些标本中提取脱氧核糖核酸（DNA）以进行分子生物学研究。

### 2、提供标本对您有何益处？

我们会对您的标本进行分子生物学分析，将有助于对某些疾病作出基因诊断，为您的治疗提供必要的建议，为您的亲属提供遗传咨询，或为疾病的研究提供有益的信息。

### 3、标本如何采集

我们将派出专业人员为您取样，如抽取静脉血2—5毫升，个别患者需抽取10毫升，对于肌肉样本的采集，我们会另外和您沟通。取样过程所采用的器皿均为一次性灭菌物品。

### 4、采集样本有何风险

您的样本采集将严格按照无菌要求操作，所用针头、针管均是一次性合格的医疗用品。样本的采集可能会有一些非常小的风险，包括短暂的疼痛、局部青紫，少数人会有轻度头晕，或极为罕见的针头感染。

### 5、如何保护您的隐私权

我们将对您的标本编号，将您的病情建立档案。我们将会严密保护您的隐私权，除了您本人或直系亲属，我们不会向他人透露您的任何资料。

请仔细阅读以下黑体字部分，并慎重考虑。如果同意，请签名：

**我同意提供样本，供医务人员进行分子生物学研究使用。我已阅读或了解了上述材料内容，并就相关疑问咨询了研究人员。提供样本是我自愿选择，提供样本后将不能取回。**

您的签名：

陈智强

日期：

2008.7.2

## 神经系统疾病患者标本采集知情同意书

亲爱的患者及亲属朋友，请您仔细阅读本文，欢迎提出问题并与您的家人、朋友或我们讨论。

### 1、为什么要采集标本

在所有人类遗传性疾病中，有60%以上与神经系统有关，特别是近年来分子生物学技术取得了迅猛发展，越来越多的疾病的发病机制从分子生物学水平得以阐明，这为疾病的治疗和预防奠定了基础。而对疾病的分子生物学研究，离不开标本的采集，我们采集患者的血样少数患者需要特殊的标本如少量肌肉标本，我们从这些标本中提取脱氧核糖核酸（DNA）以进行分子生物学研究。

### 2、提供标本对您有何益处？

我们会对您的标本进行分子生物学分析，将有助于对某些疾病作出基因诊断，为您的治疗提供必要的建议，为您的亲属提供遗传咨询，或为疾病的研究提供有益的信息。

### 3、标本如何采集

我们将派出专业人员为您取样，如抽取静脉血2—5毫升，个别患者需抽取10毫升，对于肌肉样本的采集，我们会另外和您沟通。取样过程所采用的器皿均为一次性灭菌物品。

### 4、采集样本有何风险

您的样本采集将严格按照无菌要求操作，所用针头、针管均是一次性合格的医疗用品。样本的采集可能会有一些非常小的风险，包括短暂的疼痛、局部青紫，少数人会有轻度头晕，或极为罕见的针头感染。

### 5、如何保护您的隐私权

我们将对您的标本编号，将您的病情建立档案。我们将会严密保护您的隐私权，除了您本人或直系亲属，我们不会向他人透露您的任何资料。

请仔细阅读以下黑体字部分，并慎重考虑。如果同意，请签名：

**我同意提供样本，供医务人员进行分子生物学研究使用。我已阅读或了解了上述材料内容，并就相关疑问咨询了研究人员。提供样本是我自愿选择，提供样本后将不能取回。**

您的签名：

林笑峰

日期：

2008年3月6日

## 神经系统疾病患者标本采集知情同意书

6318

亲爱的患者及亲属朋友，请您仔细阅读本文，欢迎提出问题并与您的家人、朋友或我们讨论。

### 1、为什么要采集标本

在所有人类遗传性疾病中，有60%以上与神经系统有关，特别是近年来分子生物学技术取得了迅猛发展，越来越多的疾病的发病机制从分子生物学水平得以阐明，这为疾病的治疗和预防奠定了基础。而对疾病的分子生物学研究，离不开标本的采集，我们采集患者的血样少数患者需要特殊的标本如少量肌肉标本，我们从这些标本中提取脱氧核糖核酸（DNA）以进行分子生物学研究。

### 2、提供标本对您有何益处？

我们会对您的标本进行分子生物学分析，将有助于对某些疾病作出基因诊断，为您的治疗提供必要的建议，为您的亲属提供遗传咨询，或为疾病的研究提供有益的信息。

### 3、标本如何采集

我们将派出专业人员为您取样，如抽取静脉血2—5毫升，个别患者需抽取10毫升，对于肌肉样本的采集，我们会另外和您沟通。取样过程所采用的器皿均为一次性灭菌物品。

### 4、采集样本有何风险

您的样本采集将严格按照无菌要求操作，所用针头、针管均是一次性合格的医疗用品。样本的采集可能会有一些非常小的风险，包括短暂的疼痛、局部青紫，少数人会有轻度头晕，或极为罕见的针头感染。

### 5、如何保护您的隐私权

我们将对您的标本编号，将您的病情建立档案。我们将会严密保护您的隐私权，除了您本人或直系亲属，我们不会向他人透露您的任何资料。

请仔细阅读以下黑体字部分，并慎重考虑。如果同意，请签名：

**我同意提供样本，供医务人员进行分子生物学研究使用。我已阅读或了解了上述材料内容，并就相关疑问咨询了研究人员。提供样本是我自愿选择，提供样本后将不能取回。另外，我要求将基因分析结果告知我本人。**

您的签名：

李冰

日期：

07. 11. 12

6211

## 神经系统疾病患者标本采集知情同意书

亲爱的患者及亲属朋友，请您仔细阅读本文，欢迎提出问题并与您的家人、朋友或我们讨论。

### 1、为什么要采集标本

在所有人类遗传性疾病中，有60%以上与神经系统有关，特别是近年来分子生物学技术取得了迅猛发展，越来越多的疾病的发病机制从分子生物学水平得以阐明，这为疾病的治疗和预防奠定了基础。而对疾病的分子生物学研究，离不开标本的采集，我们采集患者的血样少数患者需要特殊的标本如少量肌肉标本，我们从这些标本中提取脱氧核糖核酸（DNA）以进行分子生物学研究。

### 2、提供标本对您有何益处？

我们会对您的标本进行分子生物学分析，将有助于对某些疾病作出基因诊断，为您的治疗提供必要的建议，为您的亲属提供遗传咨询，或为疾病的研究提供有益的信息。

### 3、标本如何采集

我们将派出专业人员为您取样，如抽取静脉血2—5毫升，个别患者需抽取10毫升，对于肌肉样本的采集，我们会另外和您沟通。取样过程所采用的器皿均为一次性灭菌物品。

### 4、采集样本有何风险

您的样本采集将严格按照无菌要求操作，所用针头、针管均是一次性合格的医疗用品。样本的采集可能会有一些非常小的风险，包括短暂的疼痛、局部青紫，少数人会有轻度头晕，或极为罕见的针头感染。

### 5、如何保护您的隐私权

我们将对您的标本编号，将您的病情建立档案。我们将会严密保护您的隐私权，除了您本人或直系亲属，我们不会向他人透露您的任何资料。

请仔细阅读以下黑体字部分，并慎重考虑。如果同意，请签名：

**我同意提供样本，供医务人员进行分子生物学研究使用。我已阅读或了解了上述材料内容，并就相关疑问咨询了研究人员。提供样本是我自愿选择，提供样本后将不能取回。另外，我要求将基因分析结果告知我本人。**

您的签名：吴晓豪

日期：2009.9.10

## 神经系统疾病患者标本采集知情同意书

亲爱的患者及亲属朋友，请您仔细阅读本文，欢迎提出问题并与您的家人、朋友或我们讨论。

### 1、为什么要采集标本

在所有人类遗传性疾病中，有 60%以上与神经系统有关，特别是近年来分子生物学技术取得了迅猛发展，越来越多的疾病的发病机制从分子生物学水平得以阐明，这为疾病的治疗和预防奠定了基础。而对疾病的分子生物学研究，离不开标本的采集，我们采集患者的血样少数患者需要特殊的标本如少量肌肉标本，我们从这些标本中提取脱氧核糖核酸（DNA）以进行分子生物学研究。

### 2、提供标本对您有何益处？

我们会对您的标本进行分子生物学分析，将有助于对某些疾病作出基因诊断，为您的治疗提供必要的建议，为您的亲属提供遗传咨询，或为疾病的研究提供有益的信息。

### 3、标本如何采集

我们将派出专业人员为您取样，如抽取静脉血 2—5 毫升，个别患者需抽取 10 毫升，对于肌肉样本的采集，我们会另外和您沟通。取样过程所采用的器皿均为一次性灭菌物品。

### 4、采集样本有何风险

您的样本采集将严格按照无菌要求操作，所用针头、针管均是一次性合格的医疗用品。样本的采集可能会有一些非常小的风险，包括短暂的疼痛、局部青紫，少数人会有轻度头晕，或极为罕见的针头感染。

### 5、如何保护您的隐私权

我们将对您的标本编号，将您的病情建立档案。我们将会严密保护您的隐私权，除了您本人或直系亲属，我们不会向他人透露您的任何资料。

请仔细阅读以下黑体字部分，并慎重考虑。如果同意，请签名：

**我同意提供样本，供医务人员进行分子生物学研究使用。我已阅读或了解了上述材料内容，并就相关疑问咨询了研究人员。提供样本是我自愿选择，提供样本后将不能取回。另外，我要求将基因分析结果告知我本人。**

您的签名：

李碧如

日期：

2009.4.10



## 神经系统疾病患者标本采集知情同意书

亲爱的患者及亲属朋友，请您仔细阅读本文，欢迎提出问题并与您的家人、朋友或我们讨论。

### 1、为什么要采集标本

在所有人类遗传性疾病中，有60%以上与神经系统有关，特别是近年来分子生物学技术取得了迅猛发展，越来越多的疾病的发病机制从分子生物学水平得以阐明，这为疾病的治疗和预防奠定了基础。而对疾病的分子生物学研究，离不开标本的采集，我们采集患者的血样少数患者需要特殊的标本如少量肌肉标本，我们从这些标本中提取脱氧核糖核酸（DNA）以进行分子生物学研究。

### 2、提供标本对您有何益处？

我们会对您的标本进行分子生物学分析，将有助于对某些疾病作出基因诊断，为您的治疗提供必要的建议，为您的亲属提供遗传咨询，或为疾病的研究提供有益的信息。

### 3、标本如何采集

我们将派出专业人员为您取样，如抽取静脉血2—5毫升，个别患者需抽取10毫升，对于肌肉样本的采集，我们会另外和您沟通。取样过程所采用的器皿均为一次性灭菌物品。

### 4、采集样本有何风险

您的样本采集将严格按照无菌要求操作，所用针头、针管均是一次性合格的医疗用品。样本的采集可能会有一些非常小的风险，包括短暂的疼痛、局部青紫，少数人会有轻度头晕，或极为罕见的针头感染。

### 5、如何保护您的隐私权

我们将对您的标本编号，将您的病情建立档案。我们将会严密保护您的隐私权，除了您本人或直系亲属，我们不会向他人透露您的任何资料。

请仔细阅读以下黑体字部分，并慎重考虑。如果同意，请签名：

**我同意提供样本，供医务人员进行分子生物学研究使用。我已阅读或了解了上述材料内容，并就相关疑问咨询了研究人员。提供样本是我自愿选择，提供样本后将不能取回。**

您的签名：

张建树

日期：

2009.2.12

3669

## 神经系统疾病患者标本采集知情同意书

亲爱的患者及亲属朋友，请您仔细阅读本文，欢迎提出问题并与您的家人、朋友或我们讨论。

### 1、为什么要采集标本

在所有人类遗传性疾病中，有60%以上与神经系统有关，特别是近年来分子生物学技术取得了迅猛发展，越来越多的疾病的发病机制从分子生物学水平得以阐明，这为疾病的治疗和预防奠定了基础。而对疾病的分子生物学研究，离不开标本的采集，我们采集患者的血样少数患者需要特殊的标本如少量肌肉标本，我们从这些标本中提取脱氧核糖核酸（DNA）以进行分子生物学研究。

### 2、提供标本对您有何益处？

我们会对您的标本进行分子生物学分析，将有助于对某些疾病作出基因诊断，为您的治疗提供必要的建议，为您的亲属提供遗传咨询，或为疾病的研究提供有益的信息。

### 3、标本如何采集

我们将派出专业人员为您取样，如抽取静脉血2—5毫升，个别患者需抽取10毫升，对于肌肉样本的采集，我们会另外和您沟通。取样过程所采用的器皿均为一次性灭菌物品。

### 4、采集样本有何风险

您的样本采集将严格按照无菌要求操作，所用针头、针管均是一次性合格的医疗用品。样本的采集可能会有一些非常小的风险，包括短暂的疼痛、局部青紫，少数人会有轻度头晕，或极为罕见的针头感染。

### 5、如何保护您的隐私权

我们将对您的标本编号，将您的病情建立档案。我们将会严密保护您的隐私权，除了您本人或直系亲属，我们不会向他人透露您的任何资料。

请仔细阅读以下黑体字部分，并慎重考虑。如果同意，请签名：

**我同意提供样本，供医务人员进行分子生物学研究使用。我已阅读或了解了上述材料内容，并就相关疑问咨询了研究人员。提供样本是我自愿选择，提供样本后将不能取回。另外，我要求将基因分析结果告知我本人。**

您的签名：

林伟腾

日期：

2009.10.12



## 神经系统疾病患者标本采集知情同意书

7518

亲爱的患者及亲属朋友，请您仔细阅读本文，欢迎提出问题并与您的家人、朋友或我们讨论。

### 1、为什么要采集标本

在所有人类遗传性疾病中，有60%以上与神经系统有关，特别是近年来分子生物学技术取得了迅猛发展，越来越多的疾病的发病机制从分子生物学水平得以阐明，这为疾病的治疗和预防奠定了基础。而对疾病的分子生物学研究，离不开标本的采集，我们采集患者的血样少数患者需要特殊的标本如少量肌肉标本，我们从这些标本中提取脱氧核糖核酸（DNA）以进行分子生物学研究。

### 2、提供标本对您有何益处？

我们会对您的标本进行分子生物学分析，将有助于对某些疾病作出基因诊断，为您的治疗提供必要的建议，为您的亲属提供遗传咨询，或为疾病的研究提供有益的信息。

### 3、标本如何采集

我们将派出专业人员为您取样，如抽取静脉血2—5毫升，个别患者需抽取10毫升，对于肌肉样本的采集，我们会另外和您沟通。取样过程所采用的器皿均为一次性灭菌物品。

### 4、采集样本有何风险

您的样本采集将严格按照无菌要求操作，所用针头、针管均是一次性合格的医疗用品。样本的采集可能会有一些非常小的风险，包括短暂的疼痛、局部青紫，少数人会有轻度头晕，或极为罕见的针头感染。

### 5、如何保护您的隐私权

我们将对您的标本编号，将您的病情建立档案。我们将会严密保护您的隐私权，除了您本人或直系亲属，我们不会向他人透露您的任何资料。

请仔细阅读以下黑体字部分，并慎重考虑。如果同意，请签名：

**我同意提供样本，供医务人员进行分子生物学研究使用。我已阅读或了解了上述材料内容，并就相关疑问咨询了研究人员。提供样本是我自愿选择，提供样本后将不能取回。另外，我要求将基因分析结果告知我本人。**

您的签名：

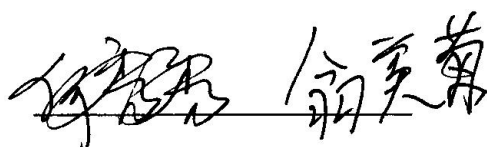

日期：

2010.8.19.

## 神经系统疾病患者标本采集知情同意书

7013

亲爱的患者及亲属朋友，请您仔细阅读本文，欢迎提出问题并与您的家人、朋友或我们讨论。

### 1、为什么要采集标本

在所有人类遗传性疾病中，有60%以上与神经系统有关，特别是近年来分子生物学技术取得了迅猛发展，越来越多的疾病的发病机制从分子生物学水平得以阐明，这为疾病的治疗和预防奠定了基础。而对疾病的分子生物学研究，离不开标本的采集，我们采集患者的血样少数患者需要特殊的标本如少量肌肉标本，我们从这些标本中提取脱氧核糖核酸（DNA）以进行分子生物学研究。

### 2、提供标本对您有何益处？

我们会对您的标本进行分子生物学分析，将有助于对某些疾病作出基因诊断，为您的治疗提供必要的建议，为您的亲属提供遗传咨询，或为疾病的研究提供有益的信息。

### 3、标本如何采集

我们将派出专业人员为您取样，如抽取静脉血2—5毫升，个别患者需抽取10毫升，对于肌肉样本的采集，我们会另外和您沟通。取样过程所采用的器皿均为一次性灭菌物品。

### 4、采集样本有何风险

您的样本采集将严格按照无菌要求操作，所用针头、针管均是一次性合格的医疗用品。样本的采集可能会有一些非常小的风险，包括短暂的疼痛、局部青紫，少数人会有轻度头晕，或极为罕见的针头感染。

### 5、如何保护您的隐私权

我们将对您的标本编号，将您的病情建立档案。我们将会严密保护您的隐私权，除了您本人或直系亲属，我们不会向他人透露您的任何资料。

请仔细阅读以下黑体字部分，并慎重考虑。如果同意，请签名：

**我同意提供样本，供医务人员进行分子生物学研究使用。我已阅读或了解了上述材料内容，并就相关疑问咨询了研究人员。提供样本是我自愿选择，提供样本后将不能取回。另外，我要求将基因分析结果告知我本人。**

您的签名：

钟福宝

日期：

2010.5.11

### 神经系统疾病患者标本采集知情同意书

4769

亲爱的患者及亲属朋友，请您仔细阅读本文，欢迎提出问题并与您的家人、朋友或我们讨论。

#### 1、为什么要采集标本

在所有人类遗传性疾病中，有 60%以上与神经系统有关，特别是近年来分子生物学技术取得了迅猛发展，越来越多的疾病的发病机制从分子生物学水平得以阐明，这为疾病的治疗和预防奠定了基础。而对疾病的分子生物学研究，离不开标本的采集，我们采集患者的血样少数患者需要特殊的标本如少量肌肉标本，我们从这些标本中提取脱氧核糖核酸（DNA）以进行分子生物学研究。

#### 2、提供标本对您有何益处？

我们会对您的标本进行分子生物学分析，将有助于对某些疾病作出基因诊断，为您的治疗提供必要的建议，为您的亲属提供遗传咨询，或为疾病的研究提供有益的信息。

#### 3、标本如何采集

我们将派出专业人员为您取样，如抽取静脉血 2—5 毫升，个别患者需抽取 10 毫升，对于肌肉样本的采集，我们会另外和您沟通。取样过程所采用的器皿均为一次性灭菌物品。

#### 4、采集样本有何风险

您的样本采集将严格按照无菌要求操作，所用针头、针管均是一次性合格的医疗用品。样本的采集可能会有一些非常小的风险，包括短暂的疼痛、局部青紫，少数人会有轻度头晕，或极为罕见的针头感染。

#### 5、如何保护您的隐私权

我们将对您的标本编号，将您的病情建立档案。我们将会严密保护您的隐私权，除了您本人或直系亲属，我们不会向他人透露您的任何资料。

请仔细阅读以下黑体字部分，并慎重考虑。如果同意，请签名：

**我同意提供样本，供医务人员进行分子生物学研究使用。我已阅读或了解了上述材料内容，并就相关疑问咨询了研究人员。提供样本是我自愿选择，提供样本后将不能取回。另外，我要求将基因分析结果告知我本人。**

您的签名：

李建伟  
李建国

日期：

2010. 10. 20

6414

### 神经系统疾病患者标本采集知情同意书

亲爱的患者及亲属朋友，请您仔细阅读本文，欢迎提出问题并与您的家人、朋友或我们讨论。

#### 1、为什么要采集标本

在所有人类遗传性疾病中，有60%以上与神经系统有关，特别是近年来分子生物学技术取得了迅猛发展，越来越多的疾病的发病机制从分子生物学水平得以阐明，这为疾病的治疗和预防奠定了基础。而对疾病的分子生物学研究，离不开标本的采集，我们采集患者的血样少数患者需要特殊的标本如少量肌肉标本，我们从这些标本中提取脱氧核糖核酸（DNA）以进行分子生物学研究。

#### 2、提供标本对您有何益处？

我们会对您的标本进行分子生物学分析，将有助于对某些疾病作出基因诊断，为您的治疗提供必要的建议，为您的亲属提供遗传咨询，或为疾病的研究提供有益的信息。

#### 3、标本如何采集

我们将派出专业人员为您取样，如抽取静脉血2—5毫升，个别患者需抽取10毫升，对于肌肉样本的采集，我们会另外和您沟通。取样过程所采用的器皿均为一次性灭菌物品。

#### 4、采集样本有何风险

您的样本采集将严格按照无菌要求操作，所用针头、针管均是一次性合格的医疗用品。样本的采集可能会有一些非常小的风险，包括短暂的疼痛、局部青紫，少数人会有轻度头晕，或极为罕见的针头感染。

#### 5、如何保护您的隐私权

我们将对您的标本编号，将您的病情建立档案。我们将会严密保护您的隐私权，除了您本人或直系亲属，我们不会向他人透露您的任何资料。

请仔细阅读以下黑体字部分，并慎重考虑。如果同意，请签名：

**我同意提供样本，供医务人员进行分子生物学研究使用。我已阅读或了解了上述材料内容，并就相关疑问咨询了研究人员。提供样本是我自愿选择，提供样本后将不能取回。另外，我要求将基因分析结果告知我本人。**

您的签名：  
林学喜  
林国辉

日期：  
2011.8

9480

## 神经系统疾病患者标本采集知情同意书

亲爱的患者及亲属朋友，请您仔细阅读本文，欢迎提出问题并与您的家人、朋友或我们讨论。

### 1、为什么要采集标本

在所有人类遗传性疾病中，有60%以上与神经系统有关，特别是近年来分子生物学技术取得了迅猛发展，越来越多的疾病的发病机制从分子生物学水平得以阐明，这为疾病的治疗和预防奠定了基础。而对疾病的分子生物学研究，离不开标本的采集，我们采集患者的血样少数患者需要特殊的标本如少量肌肉标本，我们从这些标本中提取脱氧核糖核酸（DNA）以进行分子生物学研究。

### 2、提供标本对您有何益处？

我们会对您的标本进行分子生物学分析，将有助于对某些疾病作出基因诊断，为您的治疗提供必要的建议，为您的亲属提供遗传咨询，或为疾病的研究提供有益的信息。

### 3、标本如何采集

我们将派出专业人员为您取样，如抽取静脉血2—5毫升，个别患者需抽取10毫升，对于肌肉样本的采集，我们会另外和您沟通。取样过程所采用的器皿均为一次性灭菌物品。

### 4、采集样本有何风险

您的样本采集将严格按照无菌要求操作，所用针头、针管均是一次性合格的医疗用品。样本的采集可能会有一些非常小的风险，包括短暂的疼痛、局部青紫，少数人会有轻度头晕，或极为罕见的针头感染。

### 5、如何保护您的隐私权

我们将对您的标本编号，将您的病情建立档案。我们将会严密保护您的隐私权，除了您本人或直系亲属，我们不会向他人透露您的任何资料。

请仔细阅读以下黑体字部分，并慎重考虑。如果同意，请签名：

**我同意提供样本，供医务人员进行分子生物学研究使用。我已阅读或了解了上述材料内容，并就相关疑问咨询了研究人员。提供样本是我自愿选择，提供样本后将不能取回。另外，我要求将基因分析结果告知我本人。**

您的签名：

鲍小玛  
李华峰

日期：

2011.9.21

## 神经系统疾病患者标本采集知情同意书

8319

亲爱的患者及亲属朋友，请您仔细阅读本文，欢迎提出问题并与您的家人、朋友或我们讨论。

### 1、为什么要采集标本

在所有人类遗传性疾病中，有60%以上与神经系统有关，特别是近年来分子生物学技术取得了迅猛发展，越来越多的疾病的发病机制从分子生物学水平得以阐明，这为疾病的治疗和预防奠定了基础。而对疾病的分子生物学研究，离不开标本的采集，我们采集患者的血样少数患者需要特殊的标本如少量肌肉标本，我们从这些标本中提取脱氧核糖核酸（DNA）以进行分子生物学研究。

### 2、提供标本对您有何益处？

我们会对您的标本进行分子生物学分析，将有助于对某些疾病作出基因诊断，为您的治疗提供必要的建议，为您的亲属提供遗传咨询，或为疾病的研究提供有益的信息。

### 3、标本如何采集

我们将派出专业人员为您取样，如抽取静脉血2—5毫升，个别患者需抽取10毫升，对于肌肉样本的采集，我们会另外和您沟通。取样过程所采用的器皿均为一次性灭菌物品。

### 4、采集样本有何风险

您的样本采集将严格按照无菌要求操作，所用针头、针管均是一次性合格的医疗用品。样本的采集可能会有一些非常小的风险，包括短暂的疼痛、局部青紫，少数人会有轻度头晕，或极为罕见的针头感染。

### 5、如何保护您的隐私权

我们将对您的标本编号，将您的病情建立档案。我们将会严密保护您的隐私权，除了您本人或直系亲属，我们不会向他人透露您的任何资料。

请仔细阅读以下黑体字部分，并慎重考虑。如果同意，请签名：

**我同意提供样本，供医务人员进行分子生物学研究使用。我已阅读或了解了上述材料内容，并就相关疑问咨询了研究人员。提供样本是我自愿选择，提供样本后将不能取回。另外，我要求将基因分析结果告知我本人。**

您的签名：

韩忠才

日期：

2011.1.6



11551

### 神经系统疾病患者标本采集知情同意书

亲爱的患者及亲属朋友，请您仔细阅读本文，欢迎提出问题并与您的家人、朋友或我们讨论。

#### 1、为什么要采集标本

在所有人类遗传性疾病中，有 60%以上与神经系统有关，特别是近年来分子生物学技术取得了迅猛发展，越来越多的疾病的发病机制从分子生物学水平得以阐明，这为疾病的治疗和预防奠定了基础。而对疾病的分子生物学研究，离不开标本的采集，我们采集患者的血样少数患者需要特殊的标本如少量肌肉标本，我们从这些标本中提取脱氧核糖核酸（DNA）以进行分子生物学研究。

#### 2、提供标本对您有何益处？

我们会对您的标本进行分子生物学分析，将有助于对某些疾病作出基因诊断，为您的治疗提供必要的建议，为您的亲属提供遗传咨询，或为疾病的研究提供有益的信息。

#### 3、标本如何采集

我们将派出专业人员为您取样，如抽取静脉血 2—5 毫升，个别患者需抽取 10 毫升，对于肌肉样本的采集，我们会另外和您沟通。取样过程所采用的器皿均为一次性灭菌物品。

#### 4、采集样本有何风险

您的样本采集将严格按照无菌要求操作，所用针头、针管均是一次性合格的医疗用品。样本的采集可能会有一些非常小的风险，包括短暂的疼痛、局部青紫，少数人会有轻度头晕，或极为罕见的针头感染。

#### 5、如何保护您的隐私权

我们将对您的标本编号，将您的病情建立档案。我们将会严密保护您的隐私权，除了您本人或直系亲属，我们不会向他人透露您的任何资料。

请仔细阅读以下黑体字部分，并慎重考虑。如果同意，请签名：

**我同意提供样本，供医务人员进行分子生物学研究使用。我已阅读或了解了上述材料内容，并就相关疑问咨询了研究人员。提供样本是我自愿选择，提供样本后将不能取回。另外，我要求将基因分析结果告知我本人。**

您的签名：

日期：2012.12.25

10705

## 神经系统疾病患者标本采集知情同意书

亲爱的患者及亲属朋友，请您仔细阅读本文，欢迎提出问题并与您的家人、朋友或我们讨论。

### 1、为什么要采集标本

在所有人类遗传性疾病中，有60%以上与神经系统有关，特别是近年来分子生物学技术取得了迅猛发展，越来越多的疾病的发病机制从分子生物学水平得以阐明，这为疾病的治疗和预防奠定了基础。而对疾病的分子生物学研究，离不开标本的采集，我们采集患者的血样少数患者需要特殊的标本如少量肌肉标本，我们从这些标本中提取脱氧核糖核酸（DNA）以进行分子生物学研究。

### 2、提供标本对您有何益处？

我们会对您的标本进行分子生物学分析，将有助于对某些疾病作出基因诊断，为您的治疗提供必要的建议，为您的亲属提供遗传咨询，或为疾病的研究提供有益的信息。

### 3、标本如何采集

我们将派出专业人员为您取样，如抽取静脉血2—5毫升，个别患者需抽取10毫升，对于肌肉样本的采集，我们会另外和您沟通。取样过程所采用的器皿均为一次性灭菌物品。

### 4、采集样本有何风险

您的样本采集将严格按照无菌要求操作，所用针头、针管均是一次性合格的医疗用品。样本的采集可能会有一些非常小的风险，包括短暂的疼痛、局部青紫，少数人会有轻度头晕，或极为罕见的针头感染。

### 5、如何保护您的隐私权

我们将对您的标本编号，将您的病情建立档案，我们将会严密保护您的隐私权，除了您本人或直系亲属，我们不会向他人透露您的任何资料。

请仔细阅读以下黑体字部分，并慎重考虑，如果同意，请签名：

**我同意提供样本，供医务人员进行分子生物学研究使用。我已阅读或了解了上述材料内容，并就相关疑问咨询了研究人员。提供样本是我自愿选择，提供样本后将不能取回。另外，我要求将基因分析结果告知我本人。**

您的签名：

余羽平

日期：

7月16



10182

## 神经系统疾病患者标本采集知情同意书

亲爱的患者及亲属朋友，请您仔细阅读本文，欢迎提出问题并与您的家人、朋友或我们讨论。

### 1、为什么要采集标本

在所有人类遗传性疾病中，有60%以上与神经系统有关，特别是近年来分子生物学技术取得了迅猛发展，越来越多的疾病的发病机制从分子生物学水平得以阐明，这为疾病的治疗和预防奠定了基础。而对疾病的分子生物学研究，离不开标本的采集，我们采集患者的血样少数患者需要特殊的标本如少量肌肉标本，我们从这些标本中提取脱氧核糖核酸（DNA）以进行分子生物学研究。

### 2、提供标本对您有何益处？

我们会对您的标本进行分子生物学分析，将有助于对某些疾病作出基因诊断，为您的治疗提供必要的建议，为您的亲属提供遗传咨询，或为疾病的研究提供有益的信息。

### 3、标本如何采集

我们将派出专业人员为您取样，如抽取静脉血2—5毫升，个别患者需抽取10毫升，对于肌肉样本的采集，我们会另外和您沟通。取样过程所采用的器皿均为一次性灭菌物品。

### 4、采集样本有何风险

您的样本采集将严格按照无菌要求操作，所用针头、针管均是一次性合格的医疗用品。样本的采集可能会有一些非常小的风险，包括短暂的疼痛、局部青紫，少数人会有轻度头晕，或极为罕见的针头感染。

### 5、如何保护您的隐私权

我们将对您的标本编号，将您的病情建立档案。我们将会严密保护您的隐私权，除了您本人或直系亲属，我们不会向他人透露您的任何资料。

请仔细阅读以下黑体字部分，并慎重考虑。如果同意，请签名：

**我同意提供样本，供医务人员进行分子生物学研究使用。我已阅读或了解了上述材料内容，并就相关疑问咨询了研究人员。提供样本是我自愿选择，提供样本后将不能取回。另外，我要求将基因分析结果告知我本人。**

您的签名：

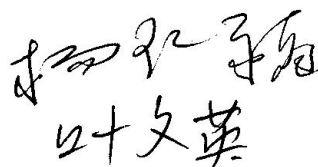  
叶文英

日期：

2012, 03.31

## 神经系统疾病患者标本采集知情同意书

亲爱的患者及亲属朋友，请您仔细阅读本文，欢迎提出问题并与您的家人、朋友或我们讨论。

### 1、为什么要采集标本

在所有人类遗传性疾病中，有60%以上与神经系统有关，特别是近年来分子生物学技术取得了迅猛发展，越来越多的疾病的发病机制从分子生物学水平得以阐明，这为疾病的治疗和预防奠定了基础。而对疾病的分子生物学研究，离不开标本的采集，我们采集患者的血样少数患者需要特殊的标本如少量肌肉标本，我们从这些标本中提取脱氧核糖核酸（DNA）以进行分子生物学研究。

### 2、提供标本对您有何益处？

我们会对您的标本进行分子生物学分析，将有助于对某些疾病作出基因诊断，为您的治疗提供必要的建议，为您的亲属提供遗传咨询，或为疾病的研究提供有益的信息。

### 3、标本如何采集

我们将派出专业人员为您取样，如抽取静脉血2—5毫升，个别患者需抽取10毫升，对于肌肉样本的采集，我们会另外和您沟通。取样过程所采用的器皿均为一次性灭菌物品。

### 4、采集样本有何风险

您的样本采集将严格按照无菌要求操作，所用针头、针管均是一次性合格的医疗用品。样本的采集可能会有一些非常小的风险，包括短暂的疼痛、局部青紫，少数人会有轻度头晕，或极为罕见的针头感染。

### 5、如何保护您的隐私权

我们将对您的标本编号，将您的病情建立档案。我们将会严密保护您的隐私权，除了您本人或直系亲属，我们不会向他人透露您的任何资料。

请仔细阅读以下黑体字部分，并慎重考虑。如果同意，请签名：

**我同意提供样本，供医务人员进行分子生物学研究使用。我已阅读或了解了上述材料内容，并就相关疑问咨询了研究人员。提供样本是我自愿选择，提供样本后将不能取回。另外，我要求将基因分析结果告知我本人。**

您的签名：

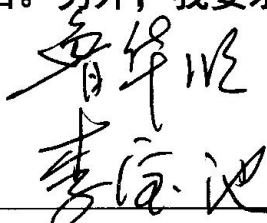  
李景仪

日期：

2013.9.15

12761

## 神经系统疾病患者标本采集知情同意书

亲爱的患者及亲属朋友，请您仔细阅读本文，欢迎提出问题并与您的家人、朋友或我们讨论。

### 1、为什么要采集标本

在所有人类遗传性疾病中，有60%以上与神经系统有关，特别是近年来分子生物学技术取得了迅猛发展，越来越多的疾病的发病机制从分子生物学水平得以阐明，这为疾病的治疗和预防奠定了基础。而对疾病的分子生物学研究，离不开标本的采集，我们采集患者的血样少数患者需要特殊的标本如少量肌肉标本，我们从这些标本中提取脱氧核糖核酸（DNA）以进行分子生物学研究。

### 2、提供标本对您有何益处？

我们会对您的标本进行分子生物学分析，将有助于对某些疾病作出基因诊断，为您的治疗提供必要的建议，为您的亲属提供遗传咨询，或为疾病的研究提供有益的信息。

### 3、标本如何采集

我们将派出专业人员为您取样，如抽取静脉血2—5毫升，个别患者需抽取10毫升，对于肌肉样本的采集，我们会另外和您沟通。取样过程所采用的器皿均为一次性灭菌物品。

### 4、采集样本有何风险

您的样本采集将严格按照无菌要求操作，所用针头、针管均是一次性合格的医疗用品。样本的采集可能会有一些非常小的风险，包括短暂的疼痛、局部青紫，少数人会有轻度头晕，或极为罕见的针头感染。

### 5、如何保护您的隐私权

我们将对您的标本编号，将您的病情建立档案。我们将会严密保护您的隐私权，除了您本人或直系亲属，我们不会向他人透露您的任何资料。

请仔细阅读以下黑体字部分，并慎重考虑。如果同意，请签名：

**我同意提供样本，供医务人员进行分子生物学研究使用。我已阅读或了解了上述材料内容，并就相关疑问咨询了研究人员。提供样本是我自愿选择，提供样本后将不能取回。另外，我要求将基因分析结果告知我本人。**

您的签名：

张云鼎

刘秋玉

日期：

2013-7-29

11664

### 神经系统疾病患者标本采集知情同意书

亲爱的患者及亲属朋友，请您仔细阅读本文，欢迎提出问题并与您的家人、朋友或我们讨论。

#### 1、为什么要采集标本

在所有人类遗传性疾病中，有 60%以上与神经系统有关，特别是近年来分子生物学技术取得了迅猛发展，越来越多的疾病的发病机制从分子生物学水平得以阐明，这为疾病的治疗和预防奠定了基础。而对疾病的分子生物学研究，离不开标本的采集，我们采集患者的血样少数患者需要特殊的标本如少量肌肉标本，我们从这些标本中提取脱氧核糖核酸（DNA）以进行分子生物学研究。

#### 2、提供标本对您有何益处？

我们会对您的标本进行分子生物学分析，将有助于对某些疾病作出基因诊断，为您的治疗提供必要的建议，为您的亲属提供遗传咨询，或为疾病的研究提供有益的信息。

#### 3、标本如何采集

我们将派出专业人员为您取样，如抽取静脉血 2—5 毫升，个别患者需抽取 10 毫升，对于肌肉样本的采集，我们会另外和您沟通。取样过程所采用的器皿均为一次性灭菌物品。

#### 4、采集样本有何风险

您的样本采集将严格按照无菌要求操作，所用针头、针管均是一次性合格的医疗用品。样本的采集可能会有一些非常小的风险，包括短暂的疼痛、局部青紫，少数人会有轻度头晕，或极为罕见的针头感染。

#### 5、如何保护您的隐私权

我们将对您的标本编号，将您的病情建立档案。我们将会严密保护您的隐私权，除了您本人或直系亲属，我们不会向他人透露您的任何资料。

请仔细阅读以下黑体字部分，并慎重考虑。如果同意，请签名：

**我同意提供样本，供医务人员进行分子生物学研究使用。我已阅读或了解了上述材料内容，并就相关疑问咨询了研究人员。提供样本是我自愿选择，提供样本后将不能取回。另外，我要求将基因分析结果告知我本人。**

您的签名：

李长娟  
王子静

日期：

13年1月15日

王子静

14689

## 神经系统疾病患者标本采集知情同意书

亲爱的患者及亲属朋友，请您仔细阅读本文，欢迎提出问题并与您的家人、朋友或我们讨论。

### 1、为什么要采集标本

在所有人类遗传性疾病中，有60%以上与神经系统有关，特别是近年来分子生物学技术取得了迅猛发展，越来越多的疾病的发病机制从分子生物学水平得以阐明，这为疾病的治疗和预防奠定了基础。而对疾病的分子生物学研究，离不开标本的采集，我们采集患者的血样少数患者需要特殊的标本如少量肌肉标本，我们从这些标本中提取脱氧核糖核酸（DNA）以进行分子生物学研究。

### 2、提供标本对您有何益处？

我们会对您的标本进行分子生物学分析，将有助于对某些疾病作出基因诊断，为您的治疗提供必要的建议，为您的亲属提供遗传咨询，或为疾病的研究提供有益的信息。

### 3、标本如何采集

我们将派出专业人员为您取样，如抽取静脉血2—5毫升，个别患者需抽取10毫升，对于肌肉样本的采集，我们会另外和您沟通。取样过程所采用的器皿均为一次性灭菌物品。

### 4、采集样本有何风险

您的样本采集将严格按照无菌要求操作，所用针头、针管均是一次性合格的医疗用品。样本的采集可能会有一些非常小的风险，包括短暂的疼痛、局部青紫，少数人会有轻度头晕，或极为罕见的针头感染。

### 5、如何保护您的隐私权

我们将对您的标本编号，将您的病情建立档案。我们将会严密保护您的隐私权，除了您本人或直系亲属，我们不会向他人透露您的任何资料。

请仔细阅读以下黑体字部分，并慎重考虑。如果同意，请签名：

**我同意提供样本，供医务人员进行分子生物学研究使用。我已阅读或了解了上述材料内容，并就相关疑问咨询了研究人员。提供样本是我自愿选择，提供样本后将不能取回。另外，我要求将基因分析结果告知我本人。**

您的签名：

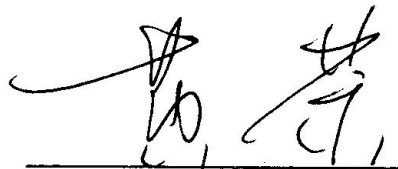

日期：



## 神经系统疾病患者标本采集知情同意书

14567

亲爱的患者及亲属朋友，请您仔细阅读本文，欢迎提出问题并与您的家人、朋友或我们讨论。

### 1、为什么要采集标本

在所有人类遗传性疾病中，有60%以上与神经系统有关，特别是近年来分子生物学技术取得了迅猛发展，越来越多的疾病的发病机制从分子生物学水平得以阐明，这为疾病的治疗和预防奠定了基础。而对疾病的分子生物学研究，离不开标本的采集，我们采集患者的血样少数患者需要特殊的标本如少量肌肉标本，我们从这些标本中提取脱氧核糖核酸（DNA）以进行分子生物学研究。

### 2、提供标本对您有何益处？

我们会对您的标本进行分子生物学分析，将有助于对某些疾病作出基因诊断，为您的治疗提供必要的建议，为您的亲属提供遗传咨询，或为疾病的研究提供有益的信息。

### 3、标本如何采集

我们将派出专业人员为您取样，如抽取静脉血2—5毫升，个别患者需抽取10毫升，对于肌肉样本的采集，我们会另外和您沟通。取样过程所采用的器皿均为一次性灭菌物品。

### 4、采集样本有何风险

您的样本采集将严格按照无菌要求操作，所用针头、针管均是一次性合格的医疗用品。样本的采集可能会有一些非常小的风险，包括短暂的疼痛、局部青紫，少数人会有轻度头晕，或极为罕见的针头感染。

### 5、如何保护您的隐私权

我们将对您的标本编号，将您的病情建立档案。我们将会严密保护您的隐私权，除了您本人或直系亲属，我们不会向他人透露您的任何资料。

请仔细阅读以下黑体字部分，并慎重考虑。如果同意，请签名：

**我同意提供样本，供医务人员进行分子生物学研究使用。我已阅读或了解了上述材料内容，并就相关疑问咨询了研究人员。提供样本是我自愿选择，提供样本后将不能取回。另外，我要求将基因分析结果告知我本人。**

您的签名：

邱丽红 邱智仁 日期：

2014.6.16

邱丽红



## 神经系统疾病患者标本采集知情同意书

亲爱的患者及亲属朋友，请您仔细阅读本文，欢迎提出问题并与您的家人、朋友或我们讨论。

### 1、为什么要采集标本

在所有人类遗传性疾病中，有60%以上与神经系统有关，特别是近年来分子生物学技术取得了迅猛发展，越来越多的疾病的发病机制从分子生物学水平得以阐明，这为疾病的治疗和预防奠定了基础。而对疾病的分子生物学研究，离不开标本的采集，我们采集患者的血样少数患者需要特殊的标本如少量肌肉标本，我们从这些标本中提取脱氧核糖核酸（DNA）以进行分子生物学研究。

### 2、提供标本对您有何益处？

我们会对您的标本进行分子生物学分析，将有助于对某些疾病作出基因诊断，为您的治疗提供必要的建议，为您的亲属提供遗传咨询，或为疾病的研究提供有益的信息。

### 3、标本如何采集

我们将派出专业人员为您取样，如抽取静脉血2—5毫升，个别患者需抽取10毫升，对于肌肉样本的采集，我们会另外和您沟通。取样过程所采用的器皿均为一次性灭菌物品。

### 4、采集样本有何风险

您的样本采集将严格按照无菌要求操作，所用针头、针管均是一次性合格的医疗用品。样本的采集可能会有一些非常小的风险，包括短暂的疼痛、局部青紫，少数人会有轻度头晕，或极为罕见的针头感染。

### 5、如何保护您的隐私权

我们将对您的标本编号，将您的病情建立档案。我们将会严密保护您的隐私权，除了您本人或直系亲属，我们不会向他人透露您的任何资料。

请仔细阅读以下黑体字部分，并慎重考虑。如果同意，请签名：

**我同意提供样本，供医务人员进行分子生物学研究使用。我已阅读或了解了上述材料内容，并就相关疑问咨询了研究人员。提供样本是我自愿选择，提供样本后将不能取回。另外，我要求将基因分析结果告知我本人。**

您的签名：

林小娟

日期：

2014.8.12

## 神经系统疾病患者标本采集知情同意书

16162

亲爱的患者及亲属朋友，请您仔细阅读本文，欢迎提出问题并与您的家人、朋友或我们讨论。

### 1、为什么要采集标本

在所有人类遗传性疾病中，有60%以上与神经系统有关，特别是近年来分子生物学技术取得了迅猛发展，越来越多的疾病的发病机制从分子生物学水平得以阐明，这为疾病的治疗和预防奠定了基础。而对疾病的分子生物学研究，离不开标本的采集，我们采集患者的血样少数患者需要特殊的标本如少量肌肉标本，我们从这些标本中提取脱氧核糖核酸（DNA）以进行分子生物学研究。

### 2、提供标本对您有何益处？

我们会对您的标本进行分子生物学分析，将有助于对某些疾病作出基因诊断，为您的治疗提供必要的建议，为您的亲属提供遗传咨询，或为疾病的研究提供有益的信息。

### 3、标本如何采集

我们将派出专业人员为您取样，如抽取静脉血2—5毫升，个别患者需抽取10毫升。对于肌肉样本的采集，我们会另外和您沟通。取样过程所采用的器皿均为一次性灭菌物品。

### 4、采集样本有何风险

您的样本采集将严格按照无菌要求操作，所用针头、针管均是一次性合格的医疗用品。样本的采集可能会有一些非常小的风险，包括短暂的疼痛、局部青紫，少数人会有轻度头晕，或极为罕见的针头感染。

### 5、如何保护您的隐私权

我们将对您的标本编号，将您的病情建立档案。我们将会严密保护您的隐私权，除了您本人或直系亲属，我们不会向他人透露您的任何资料。

请仔细阅读以下黑体字部分，并慎重考虑。如果同意，请签名：

**我同意提供样本，供医务人员进行分子生物学研究使用。我已阅读或了解了上述材料内容，并就相关疑问咨询了研究人员。提供样本是我自愿选择，提供样本后将不能取回。另外，我要求将基因分析结果告知我本人。**

您的签名：刘琪

日期：2015.5.23

家属签名：巢荣 (关系：母女) 日期：2015.5.23

备注：1. 签字或按手印。

2. 儿童或无能力签字者，请由监护人或家属代签，并注明关系。

# 福建省神经病学研究所

16046

## 神经系统疾病患者标本采集知情同意书

亲爱的患者及亲属朋友，请您仔细阅读本文，欢迎提出问题并与您的家人、朋友或我们讨论。

### 1、为什么要采集标本

在所有人类遗传性疾病中，有60%以上与神经系统有关，特别是近年来分子生物学技术取得了迅猛发展，越来越多的疾病的发病机制从分子生物学水平得以阐明，这为疾病的治疗和预防奠定了基础。而对疾病的分子生物学研究，离不开标本的采集，我们采集患者的血样少数患者需要特殊的标本如少量肌肉标本，我们从这些标本中提取脱氧核糖核酸（DNA）以进行分子生物学研究。

### 2、提供标本对您有何益处？

我们会对您的标本进行分子生物学分析，将有助于对某些疾病作出基因诊断，为您的治疗提供必要的建议，为您的亲属提供遗传咨询，或为疾病的研究提供有益的信息。

### 3、标本如何采集

我们将派出专业人员为您取样，如抽取静脉血2—5毫升，个别患者需抽取10毫升。对于肌肉样本的采集，我们会另外和您沟通。取样过程所采用的器皿均为一次性灭菌物品。

### 4、采集样本有何风险

您的样本采集将严格按照无菌要求操作，所用针头、针管均是一次性合格的医疗用品。样本的采集可能会有一些非常小的风险，包括短暂的疼痛、局部青紫，少数人会有轻度头晕，或极为罕见的针头感染。

### 5、如何保护您的隐私权

我们将对您的标本编号，将您的病情建立档案。我们将会严密保护您的隐私权，除了您本人或直系亲属，我们不会向他人透露您的任何资料。

请仔细阅读以下黑体字部分，并慎重考虑。如果同意，请签名：

**我同意提供样本，供医务人员进行分子生物学研究使用。我已阅读或了解了上述材料内容，并就相关疑问咨询了研究人员。提供样本是我自愿选择，提供样本后将不能取回。另外，我要求将基因分析结果告知我本人。**

您的签名：杨群英

日期：2015.5.8

家属签名：毛叶萍（关系：妻）

日期：2015.5.8

备注：1.签字或按手印。

2.儿童或无能力签字者，请由监护人或家属代签，并注明关系。

15610

### 神经系统疾病患者标本采集知情同意书

亲爱的患者及亲属朋友，请您仔细阅读本文，欢迎提出问题并与您的家人、朋友或我们讨论。

#### 1、为什么要采集标本

在所有人类遗传性疾病中，有60%以上与神经系统有关，特别是近年来分子生物学技术取得了迅猛发展，越来越多的疾病的发病机制从分子生物学水平得以阐明，这为疾病的治疗和预防奠定了基础。而对疾病的分子生物学研究，离不开标本的采集，我们采集患者的血样少数患者需要特殊的标本如少量肌肉标本，我们从这些标本中提取脱氧核糖核酸（DNA）以进行分子生物学研究。

#### 2、提供标本对您有何益处？

我们会对您的标本进行分子生物学分析，将有助于对某些疾病作出基因诊断，为您的治疗提供必要的建议，为您的亲属提供遗传咨询，或为疾病的研究提供有益的信息。

#### 3、标本如何采集

我们将派出专业人员为您取样，如抽取静脉血2—5毫升，个别患者需抽取10毫升。对于肌肉样本的采集，我们会另外和您沟通。取样过程所采用的器皿均为一次性灭菌物品。

#### 4、采集样本有何风险

您的样本采集将严格按照无菌要求操作，所用针头、针管均是一次性合格的医疗用品。样本的采集可能会有一些非常小的风险，包括短暂的疼痛、局部青紫，少数人会有轻度头晕，或极为罕见的针头感染。

#### 5、如何保护您的隐私权

我们将对您的标本编号，将您的病情建立档案。我们将会严密保护您的隐私权，除了您本人或直系亲属，我们不会向他人透露您的任何资料。请仔细阅读以下黑体字部分，并慎重考虑。如果同意，请签名：

**我同意提供样本，供医务人员进行分子生物学研究使用。我已阅读或了解了上述材料内容，并就相关疑问咨询了研究人员。提供样本是我自愿选择，提供样本后将不能取回。另外，我要求将基因分析结果告知我本人。**

您的签名：解胡名

日期：2015年2月11日

家属签名：韩东文 (关系：父子)

日期：2015年2月11日

备注：1. 签字或按手印。

2. 儿童或无能力签字者，请由监护人或家属代签，并注明关系。

19376

## 神经系统疾病患者标本采集知情同意书

亲爱的患者及亲属朋友，请您仔细阅读本文，欢迎提出问题并与您的家人、朋友或我们讨论。

### 1、为什么要采集标本

在所有人类遗传性疾病中，有60%以上与神经系统有关，特别是近年来分子生物学技术取得了迅猛发展，越来越多的疾病的发病机制从分子生物学水平得以阐明，这为疾病的治疗和预防奠定了基础。而对疾病的分子生物学研究，离不开标本的采集，我们采集患者的血样少数患者需要特殊的标本如少量肌肉标本，我们从这些标本中提取脱氧核糖核酸（DNA）以进行分子生物学研究。

### 2、提供标本对您有何益处？

我们会对您的标本进行分子生物学分析，将有助于对某些疾病作出基因诊断，为您的治疗提供必要的建议，为您的亲属提供遗传咨询，或为疾病的研究提供有益的信息。

### 3、标本如何采集

我们将派出专业人员为您取样，如抽取静脉血2—5毫升，个别患者需抽取10毫升。对于肌肉样本的采集，我们会另外和您沟通。取样过程所采用的器皿均为一次性灭菌物品。

### 4、采集样本有何风险

您的样本采集将严格按照无菌要求操作，所用针头、针管均是一次性合格的医疗用品。样本的采集可能会有一些非常小的风险，包括短暂的疼痛、局部青紫，少数人会有轻度头晕，或极为罕见的针头感染。

### 5、如何保护您的隐私权

我们将对您的标本编号，将您的病情建立档案。我们将会严密保护您的隐私权，除了您本人或直系亲属，我们不会向他人透露您的任何资料。

请仔细阅读以下黑体字部分，并慎重考虑。如果同意，请签名：

**我同意提供样本，供医务人员进行分子生物学研究使用。我已阅读或了解了上述材料内容，并就相关疑问咨询了研究人员。提供样本是我自愿选择，提供样本后将不能取回。另外，我要求将基因分析结果告知我本人。**

您的签名： 罗士英

日期： 2016.7.14

家属签名： 梁珍 (关系：母女) 日期： 2016.7.14

备注： 1. 签字或按手印。

2. 儿童或无能力签字者，请由监护人或家属代签，并注明关系。



18611

## 福建省神经病学研究所

### 神经系统疾病患者标本采集知情同意书

亲爱的患者及亲属朋友，请您仔细阅读本文，欢迎提出问题并与您的家人、朋友或我们讨论。

#### 1、为什么要采集标本

在所有人类遗传性疾病中，有60%以上与神经系统有关，特别是近年来分子生物学技术取得了迅猛发展，越来越多的疾病的发病机制从分子生物学水平得以阐明，这为疾病的治疗和预防奠定了基础。而对疾病的分子生物学研究，离不开标本的采集，我们采集患者的血样少数患者需要特殊的标本如少量肌肉标本，我们从这些标本中提取脱氧核糖核酸（DNA）以进行分子生物学研究。

#### 2、提供标本对您有何益处？

我们会对您的标本进行分子生物学分析，将有助于对某些疾病作出基因诊断，为您的治疗提供必要的建议，为您的亲属提供遗传咨询，或为疾病的研究提供有益的信息。

#### 3、标本如何采集

我们将派出专业人员为您取样，如抽取静脉血2—5毫升，个别患者需抽取10毫升。对于肌肉样本的采集，我们会另外和您沟通。取样过程所采用的器皿均为一次性灭菌物品。

#### 4、采集样本有何风险

您的样本采集将严格按照无菌要求操作，所用针头、针管均是一次性合格的医疗用品。样本的采集可能会有一些非常小的风险，包括短暂的疼痛、局部青紫，少数人会有轻度头晕，或极为罕见的针头感染。

#### 5、如何保护您的隐私权

我们将对您的标本编号，将您的病情建立档案。我们将会严密保护您的隐私权，除了您本人或直系亲属，我们不会向他人透露您的任何资料。

请仔细阅读以下黑体字部分，并慎重考虑。如果同意，请签名：

**我同意提供样本，供医务人员进行分子生物学研究使用。我已阅读或了解了上述材料内容，并就相关疑问咨询了研究人员。提供样本是我自愿选择，提供样本后将不能取回。另外，我要求将基因分析结果告知我本人。**

您的签名：张明仁

日期：2016.05.01

家属签名：张明仁（关系：父子）日期：2016.05.01

备注：1.签字或按手印。

2.儿童或无能力签字者，请由监护人或家属代签，并注明关系。



1 8485

## 福建省神经病学研究所

### 神经系统疾病患者标本采集知情同意书

亲爱的患者及亲属朋友，请您仔细阅读本文，欢迎提出问题并与您的家人、朋友或我们讨论。

#### 1、为什么要采集标本

在所有人类遗传性疾病中，有 60% 以上与神经系统有关，特别是近年来分子生物学技术取得了迅猛发展，越来越多的疾病的发病机制从分子生物学水平得以阐明，这为疾病的治疗和预防奠定了基础。而对疾病的分子生物学研究，离不开标本的采集，我们采集患者的血样少数患者需要特殊的标本如少量肌肉标本，我们从这些标本中提取脱氧核糖核酸（DNA）以进行分子生物学研究。

#### 2、提供标本对您有何益处？

我们会对您的标本进行分子生物学分析，将有助于对某些疾病作出基因诊断，为您的治疗提供必要的建议，为您的亲属提供遗传咨询，或为疾病的研究提供有益的信息。

#### 3、标本如何采集

我们将派出专业人员为您取样，如抽取静脉血 2—5 毫升，个别患者需抽取 10 毫升。对于肌肉样本的采集，我们会另外和您沟通。取样过程所采用的器皿均为一次性灭菌物品。

#### 4、采集样本有何风险

您的样本采集将严格按照无菌要求操作，所用针头、针管均是一次性合格的医疗用品。样本的采集可能会有一些非常小的风险，包括短暂的疼痛、局部青紫，少数人会有轻度头晕，或极为罕见的针头感染。

#### 5、如何保护您的隐私权

我们将对您的标本编号，将您的病情建立档案。我们将会严密保护您的隐私权，除了您本人或直系亲属，我们不会向他人透露您的任何资料。

请仔细阅读以下黑体字部分，并慎重考虑。如果同意，请签名：

**我同意提供样本，供医务人员进行分子生物学研究使用。我已阅读或了解了上述材料内容，并就相关疑问咨询了研究人员。提供样本是我自愿选择，提供样本后将不能取回。另外，我要求将基因分析结果告知我本人。**

您的签名： 袁琦

日期： 2016.4.25

家属签名： 孙丽 (关系： 母女)

日期： 2016.4.25

备注： 1. 签字或按手印。

2. 儿童或无能力签字者，请由监护人或家属代签，并注明关系。

福建省神经病学研究所

DNA 编号:

神经系统疾病患者标本采集知情同意书

22738

高政臣:

亲爱的患者及亲属朋友,请您仔细阅读本文,欢迎提出问题并与您的家人、朋友或我们讨论。

1、为什么要采集标本

在所有人类遗传性疾病中,有60%以上与神经系统有关,特别是近年来分子生物学技术取得了迅猛发展,越来越多的疾病的发病机制从分子生物学水平得以阐明,这为疾病的治疗和预防奠定了基础。而对疾病的分子生物学研究,离不开标本的采集,我们采集患者的血样少数患者需要特殊的标本如少量肌肉标本,我们从这些标本中提取脱氧核糖核酸(DNA)以进行分子生物学研究。

2、提供标本对您有何益处?

我们会对您的标本进行分子生物学分析,将有助于对某些疾病作出基因诊断,为您的治疗提供必要的建议,为您的亲属提供遗传咨询,或为疾病的研究提供有益的信息。

3、标本如何采集

我们将派出专业人员为您取样,如抽取静脉血2-5毫升,个别患者需抽取10毫升。个别患者因病情需要留取尿液样本,或者进行肌肉样本的采集,我们会另外和您沟通;取样过程所采用的器皿均为一次性灭菌物品。

4、采集样本有何风险

您的样本采集将严格按照无菌要求操作,所用针头、针管均是一次性合格的医疗用品。样本的采集可能会有一些非常小的风险,包括短暂的疼痛、局部青紫,少数人会有轻度头晕,或极为罕见的针头感染。

5、如何保护您的隐私权

我们将对您的标本编号,将您的病情建立档案。我们将会严密保护您的隐私权,除了您本人或直系亲属,我们不会向他人透露您的任何资料。

请仔细阅读以下黑体字部分,并慎重考虑。如果同意,请签名:

**我同意提供样本,供医务人员进行分子生物学研究使用。我已阅读或了解了上述材料内容,并就相关疑问咨询了研究人员。提供样本是我自愿选择,提供样本后将不能取回。另外,我要求将基因分析结果告知我本人。**

61. 您的签名: 高政臣 (母亲) 日期: 2017.12.29

家属签名: 高政臣 (关系: 儿子) 日期: 2017.12.29

备注: 1. 签字或按手印。

2. 儿童或无能力签字者, 请由监护人或家属代签, 并注明关系。

福建省神经病学研究所

DNA 编号:

~~163~~ 22446

神经系统疾病患者标本采集知情同意书

胡振娟:

亲爱的患者及亲属朋友,请您仔细阅读本文,欢迎提出问题并与您的家人、朋友或我们讨论。

1、为什么要采集标本

在所有人类遗传性疾病中,有60%以上与神经系统有关,特别是近年来分子生物学技术取得了迅猛发展,越来越多的疾病的发病机制从分子生物学水平得以阐明,这为疾病的治疗和预防奠定了基础。而对疾病的分子生物学研究,离不开标本的采集,我们采集患者的血样少数患者需要特殊的标本如少量肌肉标本,我们从这些标本中提取脱氧核糖核酸(DNA)以进行分子生物学研究。

2、提供标本对您有何益处?

我们会对您的标本进行分子生物学分析,将有助于对某些疾病作出基因诊断,为您的治疗提供必要的建议,为您的亲属提供遗传咨询,或为疾病的研究提供有益的信息。

3、标本如何采集

我们将派出专业人员为您取样,如抽取静脉血2—5毫升,个别患者需抽取10毫升。个别患者因病情需要留取尿液样本,或者进行肌肉样本的采集,我们会另外和您沟通。取样过程所采用的器皿均为一次性灭菌物品。

4、采集样本有何风险

您的样本采集将严格按照无菌要求操作,所用针头、针管均是一次性合格的医疗用品。样本的采集可能会有一些非常小的风险,包括短暂的疼痛、局部青紫,少数人会有轻度头晕,或极为罕见的针头感染。

5、如何保护您的隐私权

我们将对您的标本编号,将您的病情建立档案。我们将会严密保护您的隐私权,除了您本人或直系亲属,我们不会向他人透露您的任何资料。

请仔细阅读以下黑体字部分,并慎重考虑。如果同意,请签名:

**我同意提供样本,供医务人员进行分子生物学研究使用。我已阅读或了解了上述材料内容,并就相关疑问咨询了研究人员。提供样本是我自愿选择,提供样本后将不能取回。另外,我要求将基因分析结果告知我本人。**

您的签名: 胡振娟

日期: 2017年11月20日

家属签名: 王欠金 (关系: 母)

日期: 2017年11月20日

备注: 1.签字或按手印。

2.儿童或无能力签字者,请由监护人或家属代签,并注明关系。

福建省神经病学研究所

21164

神经系统疾病患者标本采集知情同意书

亲爱的患者及亲属朋友,请您仔细阅读本文,欢迎提出问题并与您的家人、朋友或我们讨论。

1、为什么要采集标本

在所有人类遗传性疾病中,有60%以上与神经系统有关,特别是近年来分子生物学技术取得了迅猛发展,越来越多的疾病的发病机制从分子生物学水平得以阐明,这为疾病的治疗和预防奠定了基础。而对疾病的分子生物学研究,离不开标本的采集,我们采集患者的血样少数患者需要特殊的标本如少量肌肉标本,我们从这些标本中提取脱氧核糖核酸(DNA)以进行分子生物学研究。

2、提供标本对您有何益处?

我们会对您的标本进行分子生物学分析,将有助于对某些疾病作出基因诊断,为您的治疗提供必要的建议,为您的亲属提供遗传咨询,或为疾病的研究提供有益的信息。

3、标本如何采集

我们将派出专业人员为您取样,如抽取静脉血2-5毫升,个别患者需抽取10毫升。个别患者因病情需要留取尿液样本,或者进行肌肉样本的采集,我们会另外和您沟通。取样过程所采用的器皿均为一次性灭菌物品。

4、采集样本有何风险

您的样本采集将严格按照无菌要求操作,所用针头、针管均是一次性合格的医疗用品。样本的采集可能会有一些非常小的风险,包括短暂的疼痛、局部青紫,少数人会有轻度头晕,或极为罕见的针头感染。

5、如何保护您的隐私权

我们将对您的标本编号,将您的病情建立档案。我们将会严密保护您的隐私权,除了您本人或直系亲属,我们不会向他人透露您的任何资料。

请仔细阅读以下黑体字部分,并慎重考虑。如果同意,请签名:

**我同意提供样本,供医务人员进行分子生物学研究使用。我已阅读或了解了上述材料内容,并就相关疑问咨询了研究人员。提供样本是我自愿选择,提供样本后将不能取回。另外,我要求将基因分析结果告知我本人。**

您的签名: 陈利锋 日期: 2017.5.30

家属签名: 陈利锋 (关系: 父子) 日期: 2017.5.30

备注: 1.签字或按手印。  
2.儿童或无能力签字者,请由监护人或家属代签,并注明关系。

版本号: 2.0

日期: 2016年04月18日

福建省神经病学研究所

20810

神经系统疾病患者标本采集知情同意书

亲爱的患者及亲属朋友,请您仔细阅读本文,欢迎提出问题并与您的家人、朋友或我们讨论。

1、为什么要采集标本

在所有人类遗传性疾病中,有60%以上与神经系统有关,特别是近年来分子生物学技术取得了迅猛发展,越来越多的疾病的发病机制从分子生物学水平得以阐明,这为疾病的治疗和预防奠定了基础。而对疾病的分子生物学研究,离不开标本的采集,我们采集患者的血样少数患者需要特殊的标本如少量肌肉标本,我们从这些标本中提取脱氧核糖核酸(DNA)以进行分子生物学研究。

2、提供标本对您有何益处?

我们会对您的标本进行分子生物学分析,将有助于对某些疾病作出基因诊断,为您的治疗提供必要的建议,为您的亲属提供遗传咨询,或为疾病的研究提供有益的信息。

3、标本如何采集

我们将派出专业人员为您取样,如抽取静脉血2-5毫升,个别患者需抽取10毫升。个别患者因病情需要留取尿液样本,或者进行肌肉样本的采集,我们会另外和您沟通。取样过程所采用的器皿均为一次性灭菌物品。

4、采集样本有何风险

您的样本采集将严格按照无菌要求操作,所用针头、针管均是一次性合格的医疗用品。样本的采集可能会有一些非常小的风险,包括短暂的疼痛、局部青紫,少数人会有轻度头晕,或极为罕见的针头感染。

5、如何保护您的隐私权

我们将对您的标本编号,将您的病情建立档案。我们将会严密保护您的隐私权,除了您本人或直系亲属,我们不会向他人透露您的任何资料。

请仔细阅读以下黑体字部分,并慎重考虑。如果同意,请签名:

我同意提供样本,供医务人员进行分子生物学研究使用。我已阅读或了解了上述材料内容,并就相关疑问咨询了研究人员。提供样本是我自愿选择,提供样本后将不能取回。另外,我要求将基因分析结果告知我本人。

您的签名: 张志娟 日期: 2017.4.13

家属签名: 杨建新 (关系: 儿子) 日期: 2017.4.13

备注: 1.签字或按手印。  
2.儿童或无能力签字者,请由监护人或家属代签,并注明关系。



版本号: 2.0

日期: 2016年04月18日

福建省神经病学研究所

201728

神经系统疾病患者标本采集知情同意书

亲爱的患者及亲属朋友,请您仔细阅读本文,欢迎提出问题并与您的家人、朋友或我们讨论。

1、为什么要采集标本

在所有人类遗传性疾病中,有60%以上与神经系统有关,特别是近年来分子生物学技术取得了迅猛发展,越来越多的疾病的发病机制从分子生物学水平得以阐明,这为疾病的治疗和预防奠定了基础。而对疾病的分子生物学研究,离不开标本的采集,我们采集患者的血样少数患者需要特殊的标本如少量肌肉标本,我们从这些标本中提取脱氧核糖核酸(DNA)以进行分子生物学研究。

2、提供标本对您有何益处?

我们会对您的标本进行分子生物学分析,将有助于对某些疾病作出基因诊断,为您的治疗提供必要的建议,为您的亲属提供遗传咨询,或为疾病的研究提供有益的信息。

3、标本如何采集

我们将派出专业人员为您取样,如抽取静脉血2-5毫升,个别患者需抽取10毫升。个别患者因病情需要留取尿液样本,或者进行肌肉样本的采集,我们会另外和您沟通。取样过程所采用的器皿均为一次性灭菌物品。

4、采集样本有何风险

您的样本采集将严格按照无菌要求操作,所用针头、针管均是一次性合格的医疗用品。样本的采集可能会有一些非常小的风险,包括短暂的疼痛、局部青紫,少数人会有轻度头晕,或极为罕见的针头感染。

5、如何保护您的隐私权

我们将对您的标本编号,将您的病情建立档案。我们将会严密保护您的隐私权,除了您本人或直系亲属,我们不会向他人透露您的任何资料。

请仔细阅读以下黑体字部分,并慎重考虑。如果同意,请签名:

我同意提供样本,供医务人员进行分子生物学研究使用。我已阅读或了解了上述材料内容,并就相关疑问咨询了研究人员。提供样本是我自愿选择,提供样本后将不能取回。另外,我要求将基因分析结果告知我本人。

您的签名: 杨祖信 日期: 2017.4.4

家属签名: 杨照楼 (关系: 爸爸) 日期: 2017.4.4

备注: 1.签字或按手印。  
2.儿童或无能力签字者,请由监护人或家属代签,并注明关系。



福建省神经病学研究所

DNA 编号:

神经系统疾病患者标本采集知情同意书

24988

马文旭:

亲爱的患者及亲属朋友,请您仔细阅读本文,欢迎提出问题并与您的家人、朋友或我们讨论。

1、为什么要采集标本

在所有人类遗传性疾病中,有60%以上与神经系统有关,特别是近年来分子生物学技术取得了迅猛发展,越来越多的疾病的发病机制从分子生物学水平得以阐明,这为疾病的治疗和预防奠定了基础。而对疾病的分子生物学研究,离不开标本的采集,我们采集患者的血样少数患者需要特殊的标本如少量肌肉标本,我们从这些标本中提取脱氧核糖核酸(DNA)以进行分子生物学研究。

2、提供标本对您有何益处?

我们会对您的标本进行分子生物学分析,将有助于对某些疾病作出基因诊断,为您的治疗提供必要的建议,为您的亲属提供遗传咨询,或为疾病的研究提供有益的信息。

3、标本如何采集

我们将派出专业人员为您取样,如抽取静脉血2-5毫升,个别患者需抽取10毫升。个别患者因病情需要留取尿液样本,或者进行肌肉样本的采集,我们会另外和您沟通。取样过程所采用的器皿均为一次性灭菌物品。

4、采集样本有何风险

您的样本采集将严格按照无菌要求操作,所用针头、针管均是一次性合格的医疗用品。样本的采集可能会有一些非常小的风险,包括短暂的疼痛、局部青紫,少数人会有轻度头晕,或极为罕见的针头感染。

5、如何保护您的隐私权

我们将对您的标本编号,将您的病情建立档案。我们将会严密保护您的隐私权,除了您本人或直系亲属,我们不会向他人透露您的任何资料。

请仔细阅读以下黑体字部分,并慎重考虑。如果同意,请签名:

我同意提供样本,供医务人员进行分子生物学研究使用。我已阅读或了解了上述材料内容,并就相关疑问咨询了研究人员。提供样本是我自愿选择,提供样本后将不能取回。另外,我要求将基因分析结果告知我本人。

您的签名: 马文旭

日期: 2018.11.13

家属签名: 张贵玲 (关系: )

日期: 2018.11.13

备注: 1.签字或按手印。

2.儿童或无能力签字者,请由监护人或家属代签,并注明关系。

日期：2017年06月20日

版本号：2.1

福建省神经病学研究所

DNA 编号：

24785

神经系统疾病患者标本采集知情同意书

刘国利：

亲爱的患者及亲属朋友，请您仔细阅读本文，欢迎提出问题并与您的家人、朋友或我们讨论。

1、为什么要采集标本

在所有人类遗传性疾病中，有60%以上与神经系统有关，特别是近年来分子生物学技术取得了迅猛发展，越来越多的疾病的发病机制从分子生物学水平得以阐明，这为疾病的治疗和预防奠定了基础。而对疾病的分子生物学研究，离不开标本的采集，我们采集患者的血样少数患者需要特殊的标本如少量肌肉标本，我们从这些标本中提取脱氧核糖核酸（DNA）以进行分子生物学研究。

2、提供标本对您有何益处？

我们会对您的标本进行分子生物学分析，将有助于对某些疾病作出基因诊断，为您的治疗提供必要的建议，为您的亲属提供遗传咨询，或为疾病的研究提供有益的信息。

3、标本如何采集

我们将派出专业人员为您取样，如抽取静脉血2—5毫升，个别患者需抽取10毫升。个别患者因病情需要留取尿液样本，或者进行肌肉样本的采集，我们会另外和您沟通。取样过程所采用的器皿均为一次性灭菌物品。

4、采集样本有何风险

您的样本采集将严格按照无菌要求操作，所用针头、针管均是一次性合格的医疗用品。样本的采集可能会有一些非常小的风险，包括短暂的疼痛、局部青紫，少数人会有轻度头晕，或极为罕见的针头感染。

5、如何保护您的隐私权

我们将对您的标本编号，将您的病情建立档案。我们将会严密保护您的隐私权，除了您本人或直系亲属，我们不会向他人透露您的任何资料。

请仔细阅读以下黑体字部分，并慎重考虑。如果同意，请签名：

**我同意提供样本，供医务人员进行分子生物学研究使用。我已阅读或了解了上述材料内容，并就相关疑问咨询了研究人员。提供样本是我自愿选择，提供样本后将不能取回。另外，我要求将基因分析结果告知我本人。**

您的签名：刘国利

日期：2018.10.16

家属签名：\_\_\_\_\_（关系：\_\_\_\_\_） 日期：\_\_\_\_\_

版本号: 2.1

日期: 2017年06月20日

福建省神经病学研究所

DNA 编号:

神经系统疾病患者标本采集知情同意书

24975

刘明汉:

亲爱的患者及亲属朋友,请您仔细阅读本文,欢迎提出问题并与您的家人、朋友或我们讨论。

1、为什么要采集标本

在所有人类遗传性疾病中,有60%以上与神经系统有关,特别是近年来分子生物学技术取得了迅猛发展,越来越多的疾病的发病机制从分子生物学水平得以阐明,这为疾病的治疗和预防奠定了基础。而对疾病的分子生物学研究,离不开标本的采集,我们采集患者的血样少数患者需要特殊的标本如少量肌肉标本,我们从这些标本中提取脱氧核糖核酸(DNA)以进行分子生物学研究。

2、提供标本对您有何益处?

我们会对您的标本进行分子生物学分析,将有助于对某些疾病作出基因诊断,为您的治疗提供必要的建议,为您的亲属提供遗传咨询,或为疾病的研究提供有益的信息。

3、标本如何采集

我们将派出专业人员为您取样,如抽取静脉血2-5毫升,个别患者需抽取10毫升。个别患者因病情需要留取尿液样本,或者进行肌肉样本的采集,我们会另外和您沟通。取样过程所采用的器皿均为一次性灭菌物品。

4、采集样本有何风险

您的样本采集将严格按照无菌要求操作,所用针头、针管均是一次性合格的医疗用品。样本的采集可能会有一些非常小的风险,包括短暂的疼痛、局部青紫,少数人会有轻度头晕,或极为罕见的针头感染。

5、如何保护您的隐私权

我们将对您的标本编号,将您的病情建立档案。我们将会严密保护您的隐私权,除了您本人或直系亲属,我们不会向他人透露您的任何资料。

请仔细阅读以下黑体字部分,并慎重考虑。如果同意,请签名:

我同意提供样本,供医务人员进行分子生物学研究使用。我已阅读或了解了上述材料内容,并就相关疑问咨询了研究人员。提供样本是我自愿选择,提供样本后将不能取回。另外,我要求将基因分析结果告知我本人。

您的签名: 刘明汉

日期: 2018.11.10

家属签名: 刘同利 (关系: 父亲)

日期: 2018.11.10

福建省神经病学研究所

DNA 编号:  
24542

神经系统疾病患者标本采集知情同意书

夏松 :

亲爱的患者及亲属朋友,请您仔细阅读本文,欢迎提出问题并与您的家人、朋友或我们讨论。

1、为什么要采集标本

在所有人类遗传性疾病中,有60%以上与神经系统有关,特别是近年来分子生物学技术取得了迅猛发展,越来越多的疾病的发病机制从分子生物学水平得以阐明,这为疾病的治疗和预防奠定了基础。而对疾病的分子生物学研究,离不开标本的采集,我们采集患者的血样少数患者需要特殊的标本如少量肌肉标本,我们从这些标本中提取脱氧核糖核酸(DNA)以进行分子生物学研究。

2、提供标本对您有何益处?

我们会对您的标本进行分子生物学分析,将有助于对某些疾病作出基因诊断,为您的治疗提供必要的建议,为您的亲属提供遗传咨询,或为疾病的研究提供有益的信息。

3、标本如何采集

我们将派出专业人员为您取样,如抽取静脉血2—5毫升,个别患者需抽取10毫升。个别患者因病情需要留取尿液样本,或者进行肌肉样本的采集,我们会另外和您沟通。取样过程所采用的器皿均为一次性灭菌物品。

4、采集样本有何风险

您的样本采集将严格按照无菌要求操作,所用针头、针管均是一次性合格的医疗用品。样本的采集可能会有一些非常小的风险,包括短暂的疼痛、局部青紫,少数人会有轻度头晕,或极为罕见的针头感染。

5、如何保护您的隐私权

我们将对您的标本编号,将您的病情建立档案。我们将会严密保护您的隐私权,除了您本人或直系亲属,我们不会向他人透露您的任何资料。

请仔细阅读以下黑体字部分,并慎重考虑。如果同意,请签名:

**我同意提供样本,供医务人员进行分子生物学研究使用。我已阅读或了解了上述材料内容,并就相关疑问咨询了研究人员。提供样本是我自愿选择,提供样本后将不能取回。另外,我要求将基因分析结果告知我本人。**

您的签名: 夏松 日期: 2018.9.13

家属签名: 夏松 (关系: 哥) 日期: 2018.9.13

备注: 1.签字或按手印。  
2.儿童或无能力签字者,请由监护人或家属代签,并注明关系。

福建省神经病学研究所

DNA 编号:

神经系统疾病患者标本采集知情同意书

2812428123

黄涛 :

亲爱的患者及亲属朋友,请您仔细阅读本文,欢迎提出问题并与您的家人、朋友或我们讨论。

1、为什么要采集标本

在所有人类遗传性疾病中,有60%以上与神经系统有关,特别是近年来分子生物学技术取得了迅猛发展,越来越多的疾病的发病机制从分子生物学水平得以阐明,这为疾病的治疗和预防奠定了基础。而对疾病的分子生物学研究,离不开标本的采集,我们采集患者的血样少数患者需要特殊的标本如少量肌肉标本,我们从这些标本中提取脱氧核糖核酸(DNA)以进行分子生物学研究。

2、提供标本对您有何益处?

我们会对您的标本进行分子生物学分析,将有助于对某些疾病作出基因诊断,为您的治疗提供必要的建议,为您的亲属提供遗传咨询,或为疾病的研究提供有益的信息。

3、标本如何采集

我们将派出专业人员为您取样,如抽取静脉血2—5毫升,个别患者需抽取10毫升。个别患者因病情需要留取尿液样本,或者进行肌肉样本的采集,我们会另外和您沟通。取样过程所采用的器皿均为一次性灭菌物品。

4、采集样本有何风险

您的样本采集将严格按照无菌要求操作,所用针头、针管均是一次性合格的医疗用品。样本的采集可能会有一些非常小的风险,包括短暂的疼痛、局部青紫,少数人会有轻度头晕,或极为罕见的针头感染。

5、如何保护您的隐私权

我们将对您的标本编号,将您的病情建立档案。我们将会严密保护您的隐私权,除了您本人或直系亲属,我们不会向他人透露您的任何资料。

请仔细阅读以下黑体字部分,并慎重考虑。如果同意,请签名:

我同意提供样本,供医务人员进行分子生物学研究使用。我已阅读或了解了上述材料内容,并就相关疑问咨询了研究人员。提供样本是我自愿选择,提供样本后将不能取回。另外,我要求将基因分析结果告知我本人。

您的签名: 黄涛

日期: 2019.12.2

家属签名: \_\_\_\_\_ (关系: \_\_\_\_\_) 日期: \_\_\_\_\_

备注: 1.签字或按手印。

2.儿童或无能力签字者,请由监护人或家属代签,并注明关系。

福建省神经病学研究所  
神经系统疾病患者标本采集知情同意书

DNA 编号:

27998

刘东阳:

亲爱的患者及亲属朋友,请您仔细阅读本文,欢迎提出问题并与您的家人、朋友或我们讨论。

### 1、为什么要采集标本

在所有人类遗传性疾病中,有60%以上与神经系统有关,特别是近年来分子生物学技术取得了迅猛发展,越来越多的疾病的发病机制从分子生物学水平得以阐明,这为疾病的治疗和预防奠定了基础。而对疾病的分子生物学研究,离不开标本的采集,我们采集患者的血样少数患者需要特殊的标本如少量肌肉标本,我们从这些标本中提取脱氧核糖核酸(DNA)以进行分子生物学研究。

### 2、提供标本对您有何益处?

我们会对您的标本进行分子生物学分析,将有助于对某些疾病作出基因诊断,为您的治疗提供必要的建议,为您的亲属提供遗传咨询,或为疾病的研究提供有益的信息。

### 3、标本如何采集

我们将派出专业人员为您取样,如抽取静脉血2—5毫升,个别患者需抽取10毫升。个别患者因病情需要留取尿液样本,或者进行肌肉样本的采集,我们会另外和您沟通。取样过程所采用的器皿均为一次性灭菌物品。

### 4、采集样本有何风险

您的样本采集将严格按照无菌要求操作,所用针头、针管均是一次性合格的医疗用品。样本的采集可能会有一些非常小的风险,包括短暂的疼痛、局部青紫,少数人会有轻度头晕,或极为罕见的针头感染。

### 5、如何保护您的隐私权

我们将对您的标本编号,将您的病情建立档案。我们将会严密保护您的隐私权,除了您本人或直系亲属,我们不会向他人透露您的任何资料。

请仔细阅读以下黑体字部分,并慎重考虑。如果同意,请签名:

我同意提供样本,供医务人员进行分子生物学研究使用。我已阅读或了解了上述材料内容,并就相关疑问咨询了研究人员。提供样本是我自愿选择,提供样本后将不能取回。另外,我要求将基因分析结果告知我本人。

您的签名: 刘东阳日期: 2019-11-12

家属签名: \_\_\_\_\_ (关系: \_\_\_\_\_) 日期: \_\_\_\_\_

备注: 1.签字或按手印。

2.儿童或无能力签字者,请由监护人或家属代签,并注明关系。



神经系统疾病样本(血液、尿液)采集知情同意书

任添胜:

亲爱的患者及亲属朋友,请您仔细阅读本文,欢迎提出问题并与您的家人、朋友或我们讨论。

您受邀参加将部分生物样本捐献福建省神经病学研究所神经系统疾病生物样本库,进行科研项目所用的行动。

收集样本为神经系统疾病样本库战略性收集。将会被用于生物方面的科研项目研究,包括基因、蛋白表达及其他分子遗传学方面的研究,为某些疾病的诊断、治疗提供预测以及遗传咨询方面提供帮助;或为疾病的研究提供有益的信息。

如果你同意,我们将收集您在疾病诊疗过程中的部分剩余样本;如需另外采集,我们会根据需求,主要采集受检者的血液样本,或少数人因需要采集尿液样本,我们从这些样本中提取脱氧核糖核酸(DNA)等物质以进行分子生物学研究。

样本类型(请打勾,如为剩余样本请注明):

血液  尿液

1. 样本采集费用与捐献者权益

样本采集为科研用途,非盈利性的,不需要患者及亲属支付任何费用;也不会给您增加额外负担的费用。

对于符合临床研究条件的人员,我们会另外告知并签定相应的知情同意书。

我们将对您的标本进行分子生物学分析,这会有助于对某些疾病作出分子水平的基因诊断,为您的治疗提供必要的建议,为您的亲属提供遗传咨询,或为疾病的研究提供有益的信息。这些信息可能会给您和与您类似的其他患者带来益处。

2. 标本如何采集

● 血液样本采集

我们将派出经过培训的专业人员为您取样,您的样本采集将严格按照无菌要求操作,所用针头、针管均是一次性合格的医疗用品,取样过程所采用的器皿均为一次性灭菌物品;一般抽取静脉血2-5毫升,个别患者需抽取10毫升。

● 尿液样本采集

个别患者因病情需要留取尿液样本,大约50-200毫升;收集尿液过程是无创性的,您将尿液直接排到我们为您准备好的预先消毒过瓶子中。此过程无任何风险和不适。

● 研究样本长期保存,样本将保存于福建医科大学附属第一医院福建省神经病学研究所(茶中路20号,联系电话:0591-87982772)。

● 临床疾病治疗相关的资料也会与样本一同收集。

3. 采集样本有何风险

样本的采集为临床常规操作,可能会有一些发生概率低、非常小的风险,包括短暂的疼痛、局部青紫,少数人会有轻度头晕。

4. 如何进行样本采集管理与样本销毁

我们参照国际先进的样本收集和管理程序,所收集的样本会经过严格的质检检验。使用样本有严格的审查程序,保证科研的合理性和可行性,以及符合伦理法律规范,及样本最终销毁的具体规范。

5. 如何保护您的隐私权

福建省神经病学研究所神经系统疾病样本库接收到您捐献的样本后,将对您的样本编号,将您的病情建立档案。我们将会严密保护您的隐私权,除了您本人同意,我们不会向他人透露您的任何资料。

为确保研究按照规定进行,必要时,政府管理部门或伦理审查委员会的成员按规定可以在研究单位查阅您的个人资料。

如果您有任何疑问,您有权向我们提出问题(请致电:0591-87982772)。

请仔细阅读以下黑体字部分,并慎重考虑。如果同意,请签名:

我已阅读或了解了上述材料内容,并就相关疑问咨询了研究人员。我同意提供样本,供医务人员进行分子生物学研究使用。提供样本是我自愿选择。我也可以选择在任何时候退出这一举动,我的任何医疗待遇与权益不会因此受到影响。

您的签名: 任添胜 日期: 2020.11.1

家属签名: 任曼丽 (关系: 父母) 日期: 2020.11.1

联系电话: 18259302249

管理员/医生签名: 江云 日期: 2020.11.1

联系电话: 13615039279

备注: 1. 签字或按手印。  
2. 儿童或无能力签字者, 请由监护人或家属代签, 并注明关系。

## 福建省神经病学研究所

样本编号: 029625

## 神经系统疾病样本(血液、尿液)采集知情同意书

蔡国栋  
亲爱的患者及亲属朋友, 请您仔细阅读本文, 欢迎提出问题并与您的家人、朋友或我们讨论。

您受邀参加将部分生物样本捐献给福建省神经病学研究所神经系统疾病生物样本库, 进行科研项目所用的行动。

收集样本为神经系统疾病样本库战略性收集。将会被用于生物方面的科研项目研究, 包括基因、蛋白表达及其他分子遗传学方面的研究, 为某些疾病的诊断、治疗提供预测以及遗传咨询方面提供帮助; 或为疾病的研究提供有益的信息。

如果你同意, 我们将收集您在疾病诊疗过程中的部分剩余样本; 如需另外采集, 我们会根据需求, 主要采集受检者的血液样本, 或少数人因需要采集尿液样本, 我们从这些样本中提取脱氧核糖核酸(DNA)等物质以进行分子生物学研究。

样本类型(请打勾, 如为剩余样本请注明):

血液  尿液

**1、样本采集费用与捐献者权益**

样本采集为科研用途, 非盈利性的, 不需要患者及亲属支付任何费用; 也不会给您增加额外负担的费用。

对于符合临床研究条件的人员, 我们会另外告之并签定相应的知情同意书。

我们将对您的标本进行分子生物学分析, 这会有助于对某些疾病作出分子水平的基因诊断, 为您的治疗提供必要的建议, 为您的亲属提供遗传咨询, 或为疾病的研究提供有益的信息。这些信息可能会给您和与您类似的其他患者带来益处。

**2、标本如何采集****● 血液样本采集**

我们将派出经过培训的专业人员为您取样, 您的样本采集将严格按照无菌要求操作, 所用针头、针管均是一次性合格的医疗用品, 取样过程所采用的器皿均为一次性灭菌物品; 一般抽取静脉血 2—5 毫升, 个别患者需抽取 10 毫升。

**● 尿液样本采集**

个别患者因病情需要留取尿液样本, 大约 50-200 毫升; 收集尿液过程是无创性的, 您将尿液直接排到我们为您准备好的预先消毒过瓶子中。此过程无任何风险和不适。

**● 研究样本长期保存, 样本将保存于福建医科大学附属第一医院福建省神经病学研究所(茶中路 20 号, 联系电话: 0591-87982772)。**

1 / 2

- 临床疾病治疗相关的资料也会与样本一同收集。

**3、采集样本有何风险**

样本的采集为临床常规操作, 可能会有一些发生概率低、非常小的风险, 包括短暂的疼痛、局部青紫, 少数人会有轻度头晕。

**4、如何进行样本采集管理与样本销毁**

我们参照国际先进的样本收集和管理程序, 所收集的样本会经过严格的质控检验。使用样本有严格的审查程序, 保证科研的合理性和可行性, 以及符合伦理法律规范, 及样本最终销毁的具体规范。

**5、如何保护您的隐私权**

福建省神经病学研究所神经系统疾病样本库接收到您捐献的样本后, 将对您的样本编号, 将您的病情建立档案。我们将会严密保护您的隐私权, 除了您本人同意, 我们不会向他人透露您的任何资料。

为确保研究按照规定进行, 必要时, 政府管理部门或伦理审查委员会的成员按规定可以在研究单位查阅您的个人资料。

如果您有任何疑问, 您有权向我们提出问题(请致电: 0591-87982772)。

请仔细阅读以下黑体字部分, 并慎重考虑。如果同意, 请签名:

我已阅读或了解了上述材料内容, 并就相关疑问咨询了研究人员。我同意提供样本, 供医务人员进行分子生物学研究使用。提供样本是我自愿选择。我也可以选择在任何时候退出这一举动, 我的任何医疗待遇与权益不会因此受到影响。

您的签名: 蔡国栋 日期: 2020.7.14

家属签名: \_\_\_\_\_ (关系: \_\_\_\_\_) 日期: 2020.7.14

联系电话: 18122722808

管理员/医生签名: 王 日期: 2020.7.14

联系电话: 1361539273

备注: 1. 签字或按手印。  
2. 儿童或无能力签字者, 请由监护人或家属代签, 并注明关系。

福建省神经病学研究所

样本编号: 28969

神经系统疾病样本(血液、尿液)采集知情同意书

郑维秋:

亲爱的患者及亲属朋友,请您仔细阅读本文,欢迎提出问题并与您的家人、朋友或我们讨论。

您受邀参加将部分生物样本捐献给福建省神经病学研究所神经系统疾病生物样本库,进行科研项目所用的行动。

收集样本为神经系统疾病样本库战略性收集,将会被用于生物方面的科研项目研究,包括基因、蛋白表达及其他分子遗传学方面的研究,为某些疾病的诊断、治疗提供预测以及遗传咨询方面提供帮助;或为疾病的研究提供有益的信息。

如果你同意,我们将收集您在疾病诊疗过程中的部分剩余样本;如需另外采集,我们会根据需求,主要采集受检者的血液样本,或少数人因需要采集尿液样本,我们从这些样本中提取脱氧核糖核酸(DNA)等物质以进行分子生物学研究。

样本类型(请打勾,如为剩余样本请注明):

血液 尿液

1. 样本采集费用与捐献者权益

样本采集为科研用途,非盈利性的,不需要患者及亲属支付任何费用;也不会给您增加额外负担的费用。

对于符合临床研究条件的人员,我们会另外告知并签定相应的知情同意书。

我们将对您的标本进行分子生物学分析,这会有助于对某些疾病作出分子水平的基因诊断,为您的治疗提供必要的建议,为您的亲属提供遗传咨询,或为疾病的研究提供有益的信息。这些信息可能会给您和与您类似的其他患者带来益处。

2. 标本如何采集

● 血液样本采集

我们将派出经过培训的专业人员为您取样,您的样本采集将严格按照无菌要求操作,所用针头、针管均是一次性合格的医疗用品,取样过程所采用的器皿均为一次性灭菌物品;一般抽取静脉血2-5毫升,个别患者需抽取10毫升。

● 尿液样本采集

个别患者因病情需要留取尿液样本,大约50-200毫升;收集尿液过程是无创性的,您将尿液直接排到我们为您准备好的预先消毒过瓶子中。此过程无任何风险和不适。

● 研究样本长期保存,样本将保存于福建医科大学附属第一医院福建省神经病学研究所(茶中路20号,联系电话:0591-87982772)。

● 临床疾病治疗相关的资料也会与样本一同收集。

3. 采集样本有何风险

样本的采集为临床常规操作,可能会有一些发生概率低、非常小的风险,包括短暂的疼痛、局部青紫,少数人会有轻度头晕。

4. 如何进行样本采集管理与样本销毁

我们参照国际先进的样本收集和管理程序,所收集的样本会经过严格的质控检验。使用样本有严格的审查程序,保证科研的合理性和可行性,以及符合伦理法律法规,及样本最终销毁的具体规范。

5. 如何保护您的隐私权

福建省神经病学研究所神经系统疾病样本库接收到您捐献的样本后,将对您的样本编号,将您的病情建立档案。我们将会严密保护您的隐私权,除了您本人同意,我们不会向他人透露您的任何资料。

为确保研究按照规定进行,必要时,政府管理部门或伦理审查委员会的成员按规定可以在研究单位查阅您的个人资料。

如果您有任何疑问,您有权向我们提出问题(请致电:0591-87982772)。

请仔细阅读以下黑体字部分,并慎重考虑。如果同意,请签名:

我已阅读或了解了上述材料内容,并就相关疑问咨询了研究人员。我同意提供样本,供医务人员进行分子生物学研究使用。提供样本是我自愿选择。我也可以选择在任何时候退出这一举动,我的任何医疗待遇与权益不会因此受到影响。

您的签名: 郑维秋 日期: 2020.5.13

家属签名: \_\_\_\_\_ (关系: \_\_\_\_\_) 日期: \_\_\_\_\_

联系电话: \_\_\_\_\_

管理员/医生签名: J... 日期: 2020.5.13

联系电话: 1366039279

备注: 1. 签字或按手印。

2. 儿童或无能力签字者,请由监护人或家属代签,并注明关系。

### 受试者知情同意书

敬爱的患者:

您将被邀请参加一项由福建医科大学附属第一医院神经内科王志强医生(0591-87982772)主持的关于面肩胛型肌营养不良症(Facioscapulohumeral Muscular Dystrophy, FSHD)的观察性队列研究。此项目由科研课题资助进行。由于您是FSHD患者/基因携带者或家系成员而被邀请加入此项研究。本知情同意书提供给您一些信息帮助您决定是否参加此项临床研究。您参加本项研究是自愿的。本次研究已通过本研究机构伦理审查委员会审查,伦理委员会办公室电话0591-87981029。如果你同意加入此项研究,请您仔细阅读下列说明,如有疑问请向研究者提出。

#### 研究目的:

FSHD是一类常染色体显性遗传神经肌肉变性疾病,主要表现为对称性(或不对称性)肌无力和肌萎缩,一般先累及面肌、肩胛带肌和上臂肌群,逐渐向下进展累及躯干肌群和下肢肌群,20%患者最终可能需要拄拐或轮椅才能出行。该病存在高度家系间和家系内临床异质性,其原因尚存在争议。FSHD的发病机制复杂,根据分子遗传学特点,分为两种亚型,FSHD1和FSHD2。FSHD1与4号染色体长臂亚端粒区(4q35)内一条多态性EcoRI片段内部3.3-kb串联重复单位(D4Z4 Repeats, DRs)多拷贝缺失相关,患者的D4Z4重复单元缩短至1-9个并携带下游4qA/4qA-L等位基因。FSHD2主要由SMCHD1基因突变引起。两型在临床表型上高度一致,在分子上均与表观遗传调控改变相关;导致4q35-DRs区域低甲基化,引起DUX4基因在骨骼肌细胞中重新表达,产生多种毒性损害作用。FSHD目前尚无特异性的治疗方法,以对症和支持治疗为主,新的治疗方法的开发需要更好的了解疾病的自然史。迄今,国内尚无针对FSHD患者的临床和遗传队列研究。因此,本方案旨在观察FSHD队列的临床谱和基因谱,指导中国FSHD人的临床管理,并为将来可能出现的新的治疗方法提供研究基础。

#### 研究过程和方法:

本研究招募符合入选条件的FSHD病人500人,观察疾病自然史及进展。如果您同意参与这项研究,我们将对每位受试者进行编号,建立病历档案,进行人口学资料和病史采集,由专业人员进行肌肉功能、运动功能、表型分型及严重程度评分等临床体检,进行相关辅助检查;并对每位受试者采集静脉血10毫升,用于基因诊断(由专业实验技术人员进行)。必要时,将进行肌肉活检诊断手术,收集手术过程中剩余的组织的约50毫克,并进行成纤维和成肌细胞的分离培养。您的样品仅用于FSHD的队列登记研究。

#### 研究可能的受益:

从本研究中得到的信息将有助于获得FSHD疾病自然史、基因型-表型联系及进展等相关数据,这些信息将有益于FSHD患者的临床管理,并为将来可能出现的新的治疗方法提供研究基础。

#### 研究风险与不适:

样本采集将严格按照无菌要求操作,可能会有短暂的疼痛、局部青紫、晕针等反应。我们会监测研究中所有病人的任何不良反应。如果您在访视之间出现任何不良反应,请及时给您的研究医生打电话咨询。

您需告诉您的家人或与您亲近的朋友您正在参加一项临床研究,他们可以注意上面

描述的事件。如果他们对您参加研究有疑问,您可以告诉他们怎样联系您的研究医生。

#### 可选择的其它诊疗方法:

在整个研究期间您不能再参加其他任何有关药物或者医疗器械的临床研究,进行了其他治疗措施需与您的研究医生及时沟通。

#### 隐私问题:

如果您决定参加本项研究,您参加试验及在试验中的个人资料均属保密。您的血/皮肤/肌肉活检标本将以研究编号数字而非您的姓名加以标识。可以识别您身份的信息将不会透露给研究小组以外的成员,除非获得您的许可。所有的研究成员和研究申办方都被要求对您的身份保密。您的档案将保存在福建医科大学附属第一医院神经内科档案柜中,仅供研究人员查阅。为确保研究按照规定进行,必要时,政府管理部门或伦理审查委员会的成员按规定可以在研究单位查阅您的个人资料。这项研究结果发表时,也需要对保密方面进行承诺。

#### 费用和补偿:

此项研究的神经功能测评、抽血、样品检测费用等由项目经费支出(王志强,国家自然科学基金经费,100万元)。如果您因参与这项研究而受到伤害或额外负担:如发生与该项临床研究相关的损害时,您可以获得免费治疗和/或相应的补偿(包括但不限于免费检查、交通补贴、营养补贴、误工补贴等补偿)。

#### 自由退出:

作为受试者,您可随时了解与本项研究有关的信息资料和研究进展,自愿决定(继续)参加还是不(继续)参加。参加后您可以选择在任何时候要求退出研究,您的数据将不纳入研究结果,任何医疗待遇与权益不会因此而受到影响。如果继续参加研究会给您造成严重的伤害,研究者也将会中止研究的进行。但在参加研究期间,请您提供有关自身病史和当前身体状况以及参与其他研究的真实情况,若因没有遵守研究计划,或者发生与研究相关的损伤等其它原因,研究医师可以终止您继续参与本项研究。

#### 联系方式:

如果您有与本项研究有关的问题,或您在研究过程中发生了任何不适与损伤,或有关于本项研究参加者权益方面的问题,您可以与王志强医生联系,电话13615039279。

#### 知情同意签字:

我已阅读本知情同意书,且我的医生已经将此次临床试验的目的、内容、风险和受益情况向我作了详细的解释说明,对我询问的所有问题也给予了解答,我对此项临床研究已经了解,我自愿参加本项研究,在无特殊情况下,尽可能完整的接受本次临床研究。

受试者签名: 

研究者签字: 

联系手机号: 13615039279

联系手机号: 13615039279

日期: 2020年9月7日

日期: 2020年9月7日

(如果受试者无识字能力则需见证人签名,如果受试者无行为能力则需代理人同意)

法定代理人/见证人签名: \_\_\_\_\_ 与受试者关系: \_\_\_\_\_

日期: \_\_\_\_年\_\_月\_\_日

### 受试者知情同意书

敬爱的患者:

您将被邀请参加一项由福建医科大学附属第一医院神经内科王志强医生 (0591-87982772) 主持的关于面肩胛型肌营养不良症 (Facioscapulohumeral Muscular Dystrophy, FSHD) 的观察性队列研究。此项目由科研课题资助进行。由于您是 FSHD 患者/基因携带者或家系成员而被邀请加入此项研究。本知情同意书提供给您一些信息以帮助您决定是否参加此项临床研究。您参加本项研究是自愿的。本次研究已通过本研究机构伦理审查委员会审查, 伦理委员会办公室电话 0591-87981029。如果你同意加入此项研究, 请您仔细阅读下列说明, 如有疑问请向研究者提出。

#### 研究目的:

FSHD 是一类常染色体显性遗传神经肌肉变性疾病, 主要表现为对称性 (或不对称性) 肌无力和肌萎缩, 一般先累及面肌、肩胛带肌和上臂肌群, 逐渐向下进展累及躯干肌群和下肢肌群, 20%患者最终可能需要拄拐或轮椅才能出行。该病存在高度家系间和家系内临床异质性, 其原因尚存在争议。FSHD 的发病机制复杂, 根据分子遗传学特点, 分为两种亚型, FSHD1 和 FSHD2。FSHD1 与 4 号染色体长臂亚端粒区 (4q35) 内一条多态性 EcoRI 片段内部 3.3-kb 串联重复单位 (D4Z4 Repeats, DRs) 多拷贝缺失相关, 患者的 D4Z4 重复单元缩短至 1-9 个并携带下游 4qA/4qA-L 等位基因。FSHD2 主要由 SMCHD1 基因突变引起。两型在临床表型上高度一致, 在分子上均与表观遗传调控改变相关; 导致 4q35-DRs 区域低甲基化, 引起 DNMT3 基因在骨骼肌细胞中重新表达, 产生多种毒性损害作用。FSHD 目前尚无特异性的治疗方法, 以对症和支持治疗为主, 新的治疗方法的开发需要更好的了解疾病的自然史。迄今, 国内尚无针对 FSHD 患者的临床和遗传队列研究。因此, 本方案旨在观察 FSHD 队列的临床谱和基因谱, 指导中国 FSHD 人的临床管理, 并为将来可能出现的新的治疗方法提供研究基础。

#### 研究过程和方法:

本研究招募符合入选条件的 FSHD 病人 500 人, 观察疾病自然史及进展。如果您同意参与这项研究, 我们将对每位受试者进行编号, 建立病历档案, 进行人口学资料和病史采集, 由专业人员进行肌肉功能、运动功能、表型分型及严重程度评分等临床体检, 进行相关辅助检查; 并对每位受试者采集静脉血 10 毫升, 用于基因诊断 (由专业实验技术人员进行)。必要时, 将进行肌肉活检诊断手术, 收集手术过程中剩余的组织的约 50 毫克, 并进行成纤维和成肌细胞的分离培养。您的样品仅用于 FSHD 的队列登记研究。

#### 研究可能的受益:

从本研究中得到的信息将有助于获得 FSHD 疾病自然史、基因型-表型联系及进展等相关数据, 这些信息将有益于 FSHD 患者的临床管理, 并为将来可能出现的新的治疗方法提供研究基础。

#### 研究风险与不适:

样本采集将严格按照无菌要求操作, 可能会有短暂的疼痛、局部青紫、晕针等反应。我们会监测研究中所有病人的任何不良反应。如果您在访视之间出现任何不良反应, 请及时给您的研究医生打电话咨询。

您需告诉您的家人或与您亲近的朋友您正在参加一项临床研究, 他们可以注意上面

描述的事件。如果他们对您参加研究有疑问, 您可以告诉他们怎样联系您的研究医生。

#### 可选择的其他诊疗方法:

在整个研究期间您不能再参加其他任何有关药物或者医疗器械的临床研究, 进行了其他治疗措施需与您的研究医生及时沟通。

#### 隐私问题:

如果您决定参加本项研究, 您参加试验及在试验中的个人资料均属保密。您的血/皮肤/肌肉活检标本将以研究编号数字而非您的姓名加以标识。可以识别您身份的信息将不会透露给研究小组以外的成员, 除非获得您的许可。所有的研究成员和研究申办方都被要求对您的身份保密。您的档案将保存在福建医科大学附属第一医院神经内科档案柜中, 仅供研究人员查阅。为确保研究按照规定进行, 必要时, 政府管理部门或伦理审查委员会的成员按规定可以在研究单位查阅您的个人资料。这项研究结果发表时, 也需要对保密方面进行承诺。

#### 费用和补偿:

此项研究的神经功能测评、抽血、样品检测费用等由项目经费支出 (王志强, 国家自然科学基金经费, 100 万元)。如果您因参与此项研究而受到伤害或额外负担: 如发生与该项临床研究相关的损害时, 您可以获得免费治疗和/或相应的补偿 (包括但不限于免费检查、交通补贴、营养补贴、误工补贴等补偿)。

#### 自由退出:

作为受试者, 您可随时了解与本项研究有关的信息资料和研究进展, 自愿决定 (继续) 参加还是不 (继续) 参加。参加后您可以选择在任何时候要求退出研究, 您的数据将不纳入研究结果, 任何医疗待遇与权益不会因此而受到影响。如果继续参加研究会给您造成严重的伤害, 研究者也将会中止研究的进行。但在参加研究期间, 请您提供有关自身病史和当前身体状况以及参与其他研究的真实情况, 若因没有遵守研究计划, 或者发生与研究相关的损伤等其它原因, 研究医师可以终止您继续参与本项研究。

#### 联系方式:

如果您有与本项研究有关的问题, 或您在研究过程中发生了任何不适与损伤, 或有关于本项研究参加者权益方面的问题, 您可以与王志强医生联系, 电话 13615039279。

#### 知情同意签字:

我已阅读本知情同意书, 且我的医生已经将此次临床试验的目的、内容、风险和受益情况向我作了详细的解释说明, 对我询问的所有问题也给予了解答, 我对此项临床研究已经了解, 我自愿参加本项研究, 在无特殊情况下, 尽可能完整的接受本次临床研究。

受试者签名: 郭国俊 (代替)

研究者签字: Jun

联系手机号: 1360719085

联系手机号: 13615039279

日期: 20 年 9 月 1 日

日期: 2020 年 9 月 1 日

(如果受试者无识字能力则需见证人签名, 如果受试者无行为能力则需代理人同意)

法定代理人/见证人签名: 郭海森

与受试者关系: 1

日期:      年      月      日

### 受试者知情同意书

敬爱的患者:

您将被邀请参加一项由福建医科大学附属第一医院神经内科王志强医生 (0591-87982772) 主持的关于面肩胛型肌营养不良症 (Facioscapulohumeral Muscular Dystrophy, FSHD) 的观察性队列研究。此项目由科研课题资助进行。由于您是 FSHD 患者/基因携带者或家系成员而被邀请加入此项研究。本知情同意书提供给您一些信息以帮助您决定是否参加此项临床研究。您参加本项研究是自愿的。本次研究已通过本研究机构伦理审查委员会审查, 伦理委员会办公室电话 0591-87981029。如果你同意加入此项研究, 请您仔细阅读下列说明, 如有疑问请向研究者提出。

#### 研究目的:

FSHD 是一类常染色体显性遗传神经肌肉变性疾病, 主要表现为对称性 (或不对称性) 肌无力和肌萎缩, 一般先累及面肌、肩胛带肌和上臂肌群, 逐渐向下进展累及躯干肌群和下肢肌群, 20%患者最终可能需要拄拐或轮椅才能出行。该病存在高度家系间和家系内临床异质性, 其原因尚存在争议。FSHD 的发病机制复杂, 根据分子遗传学特点, 分为两种亚型, FSHD1 和 FSHD2。FSHD1 与 4 号染色体长臂亚端粒区 (4q35) 内一条多态性 *EcoRI* 片段内部 3.3-kb 串联重复单位 (D4Z4 Repeats, DRs) 多拷贝缺失相关, 患者的 D4Z4 重复单元缩短至 1-9 个并携带下游 4qA/4qA-L 等位基因。FSHD2 主要由 *SMCHD1* 基因突变引起。两型在临床表型上高度一致, 在分子上均与表观遗传调控改变相关: 导致 4q35-DRs 区域低甲基化, 引起 *DUX4* 基因在骨骼肌细胞中重新表达, 产生多种毒性损害作用。FSHD 目前尚无特异性的治疗方法, 以对症和支持治疗为主, 新的治疗方法的开发需要更好的了解疾病的自然史。迄今, 国内尚无针对 FSHD 患者的临床和遗传队列研究。因此, 本方案旨在观察 FSHD 队列的临床谱和基因组, 指导中国 FSHD 人的临床管理, 并为将来可能出现的新的治疗方法提供研究基础。

#### 研究过程和方法:

本研究招募符合入选条件的 FSHD 病人 500 人, 观察疾病自然史及进展。如果您同意参与这项研究, 我们将对每位受试者进行编号, 建立病历档案, 进行人口学资料和病史采集, 由专业人员进行肌肉功能、运动功能、表型分型及严重程度评分等临床体检, 进行相关辅助检查; 并对每位受试者采集静脉血 10 毫升, 用于基因诊断 (由专业实验技术员进行)。必要时, 将进行肌肉活检诊断手术, 收集手术过程中剩余的组织约 50 毫克, 并进行成纤维和成肌细胞的分离培养。您的样品仅用于 FSHD 的队列登记研究。

#### 研究可能的受益:

从本研究中得到的信息将有助于获得 FSHD 疾病自然史、基因型-表型联系及进展等相关数据, 这些信息将有益于 FSHD 患者的临床管理, 并为将来可能出现的新的治疗方法提供研究基础。

#### 研究风险与不适:

样本采集将严格按照无菌要求操作, 可能会有短暂的疼痛、局部青紫、晕针等反应。我们会监测研究中所有病人的任何不良反应。如果您在访视之间出现任何不良反应, 请及时给您的研究医生打电话咨询。  
您需告诉您的家人或与您亲近的朋友您正在参加一项临床研究, 他们可以注意上面

描述的事件。如果他们对您参加研究有疑问, 您可以告诉他们怎样联系您的研究医生。  
可选择的其它诊疗方法:

在整个研究期间您不能再参加其他任何有关药物或者医疗器械的临床研究, 进行了其他治疗措施需与您的研究医生及时沟通。

#### 隐私问题:

如果您决定参加本项研究, 您参加试验及在试验中的个人资料均属保密。您的血/皮肤/肌肉活检标本将以研究编号数字而非您的姓名加以标识。可以识别您身份的信息将不会透露给研究小组以外的成员, 除非获得您的许可。所有的研究成员和研究申办方都被要求对您的身份保密。您的档案将保存在福建医科大学附属第一医院神经内科档案柜中, 仅供研究人员查阅。为确保研究按照规定进行, 必要时, 政府管理部门或伦理审查委员会的成员按规定可以在研究单位查阅您的个人资料。这项研究结果发表时, 也需要对保密方面进行承诺。

#### 费用和补偿:

此项研究的神经功能测评、抽血、样品检测费用等由项目经费支出 (王志强, 国家自然科学基金, 100 万元)。如果您因参与这项研究而受到伤害或额外负担: 如发生与该项临床研究相关的损害时, 您可以获得免费治疗和/或相应的补偿 (包括但不限于免费检查、交通补贴、营养补贴、误工补贴等补偿)。

#### 自由退出:

作为受试者, 您可随时了解与本项研究有关的信息资料和研究进展, 自愿决定 (继续) 参加还是不 (继续) 参加。参加后您可以选择在任何时候要求退出研究, 您的数据将不纳入研究结果, 任何医疗待遇与权益不会因此而受到影响。如果继续参加研究会给您造成严重的伤害, 研究者也将中止研究的进行。但在参加研究期间, 请您提供有关自身病史和当前身体状况以及参与其他研究的真实情况, 若因没有遵守研究计划, 或者发生与研究相关的损伤等其它原因, 研究医师可以终止您继续参与本项研究。

#### 联系方式:

如果您有与本项研究有关的问题, 或您在研究过程中发生了任何不适与损伤, 或有关于本项研究参加者权益方面的问题, 您可以与王志强医生联系, 电话 13615039279。

#### 知情同意签字:

我已阅读本知情同意书, 且我的医生已经将此次临床试验的目的、内容、风险和受益情况向我作了详细的解释说明, 对我询问的所有问题也给予了解答, 我对此项临床研究已经了解, 我自愿参加本项研究, 在无特殊情况下, 尽可能完整的接受本次临床研究。

受试者签名: 朱翔宇

研究者签名: 王志强

联系电话: 13810195528

联系电话: 13615039279

日期: 2020年 9月 30日

日期: 2020年 9月 30日

(如果受试者无识字能力则需见证人签名, 如果受试者无行为能力则需代理人同意)  
法定代理人/见证人签名: \_\_\_\_\_ 与受试者关系: \_\_\_\_\_

日期: \_\_\_\_\_年 \_\_\_\_\_月 \_\_\_\_\_日
