# Supplementary figures and images for: Prevalence and disease progression of genetically-confirmed facioscapulohumeral muscular dystrophy type 1 (FSHD1) in China between 2001 and 2020: a nationwide population-based study
Source: PubMed Central journal article supplement — Lancet Reg Health West Pac. 2021 Nov 22;18:100323. doi: 10.1016/j.lanwpc.2021.100323 (PMC8671729; doi:10.1016/j.lanwpc.2021.100323), 2021-11-22

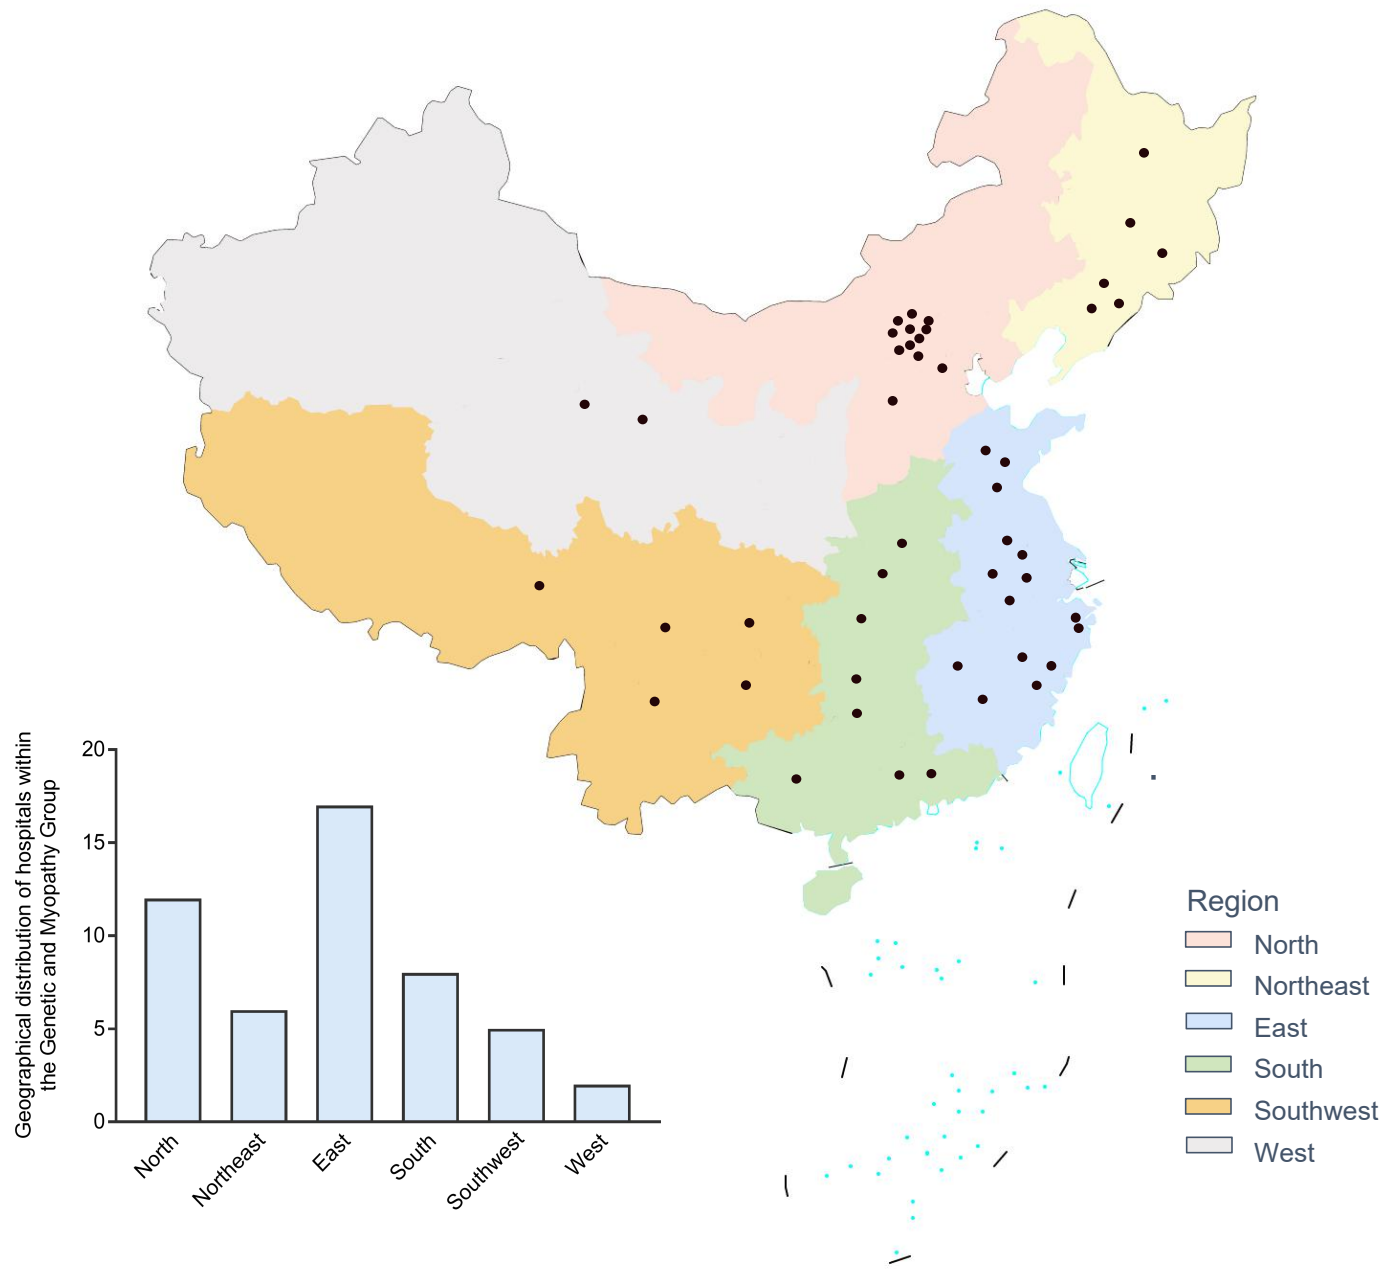

Supplement: mmc4.pdf [file mmc4.pdf]

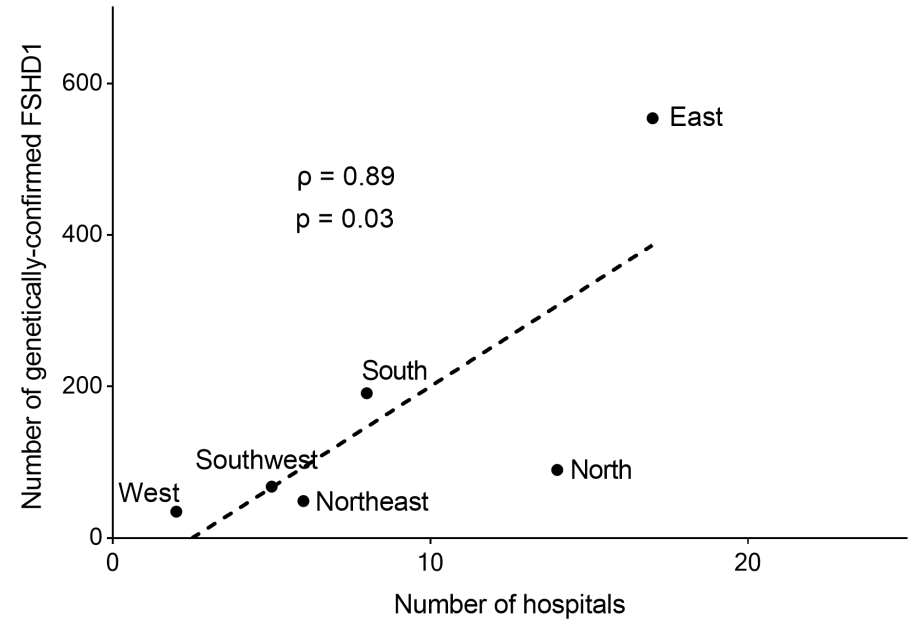

Supplement: mmc5.pdf [file mmc5.pdf]

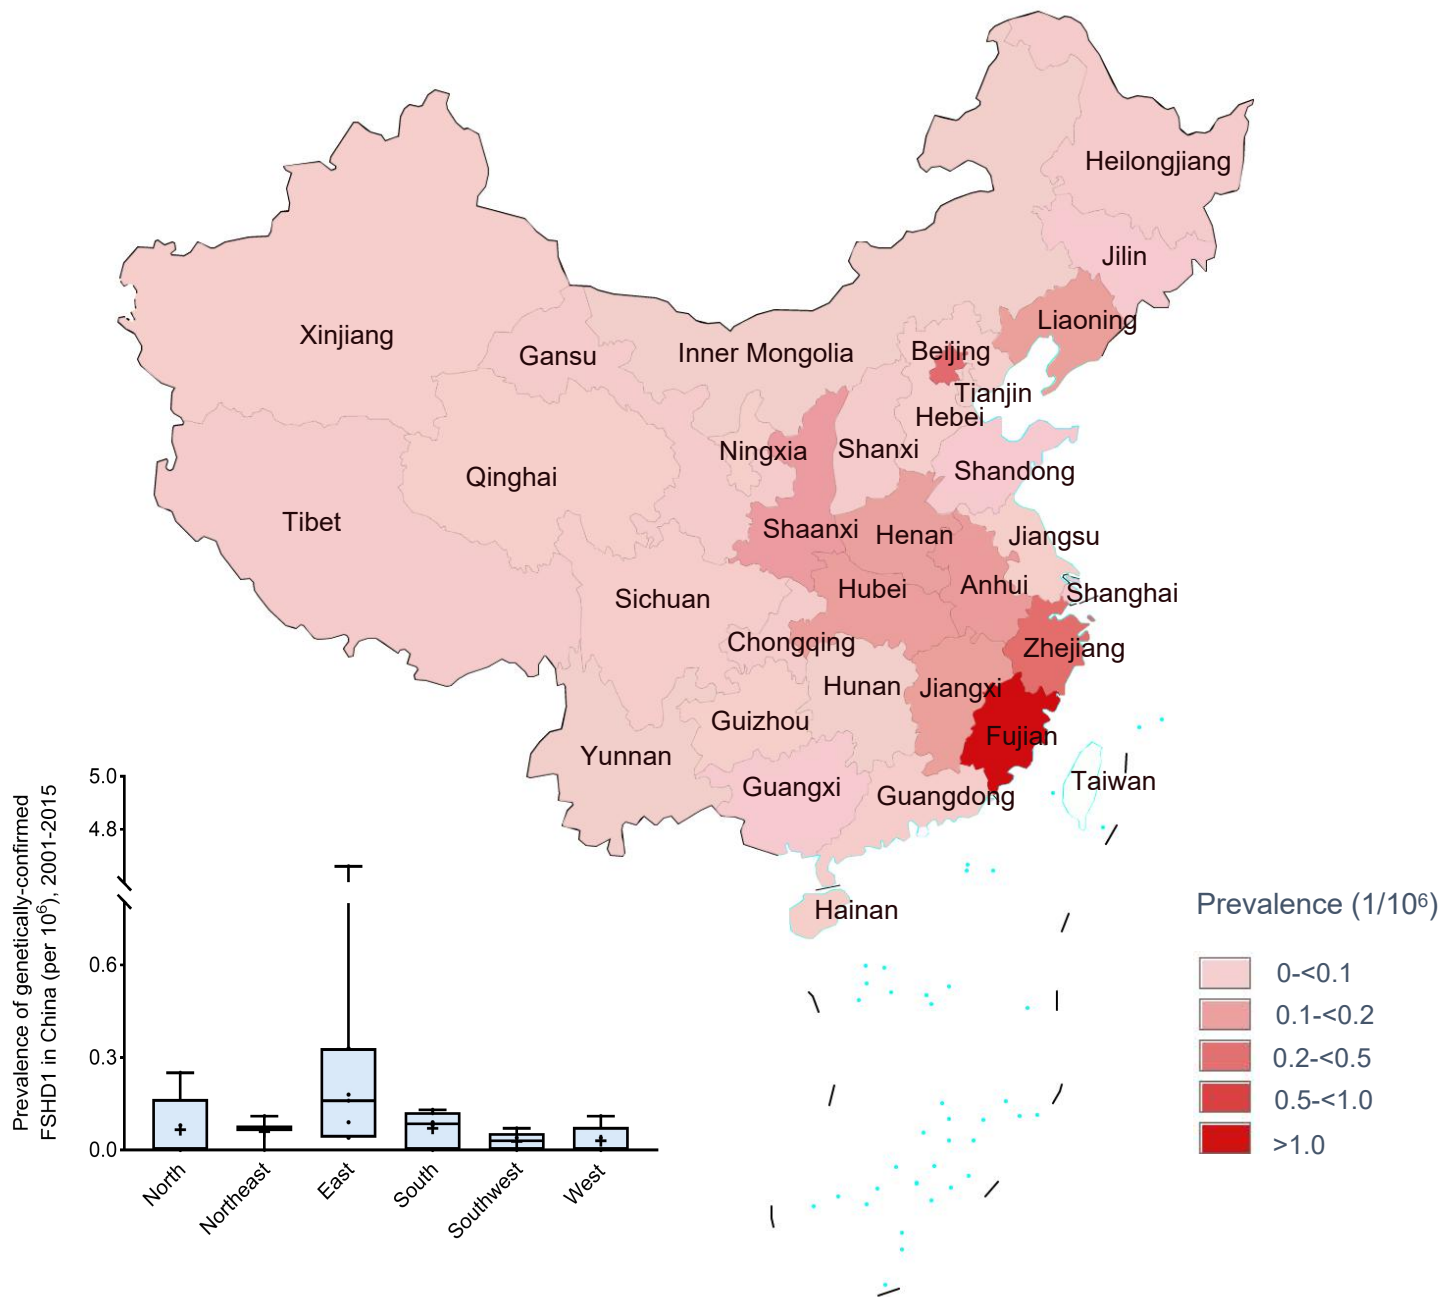

Supplement: mmc6.pdf [file mmc6.pdf]

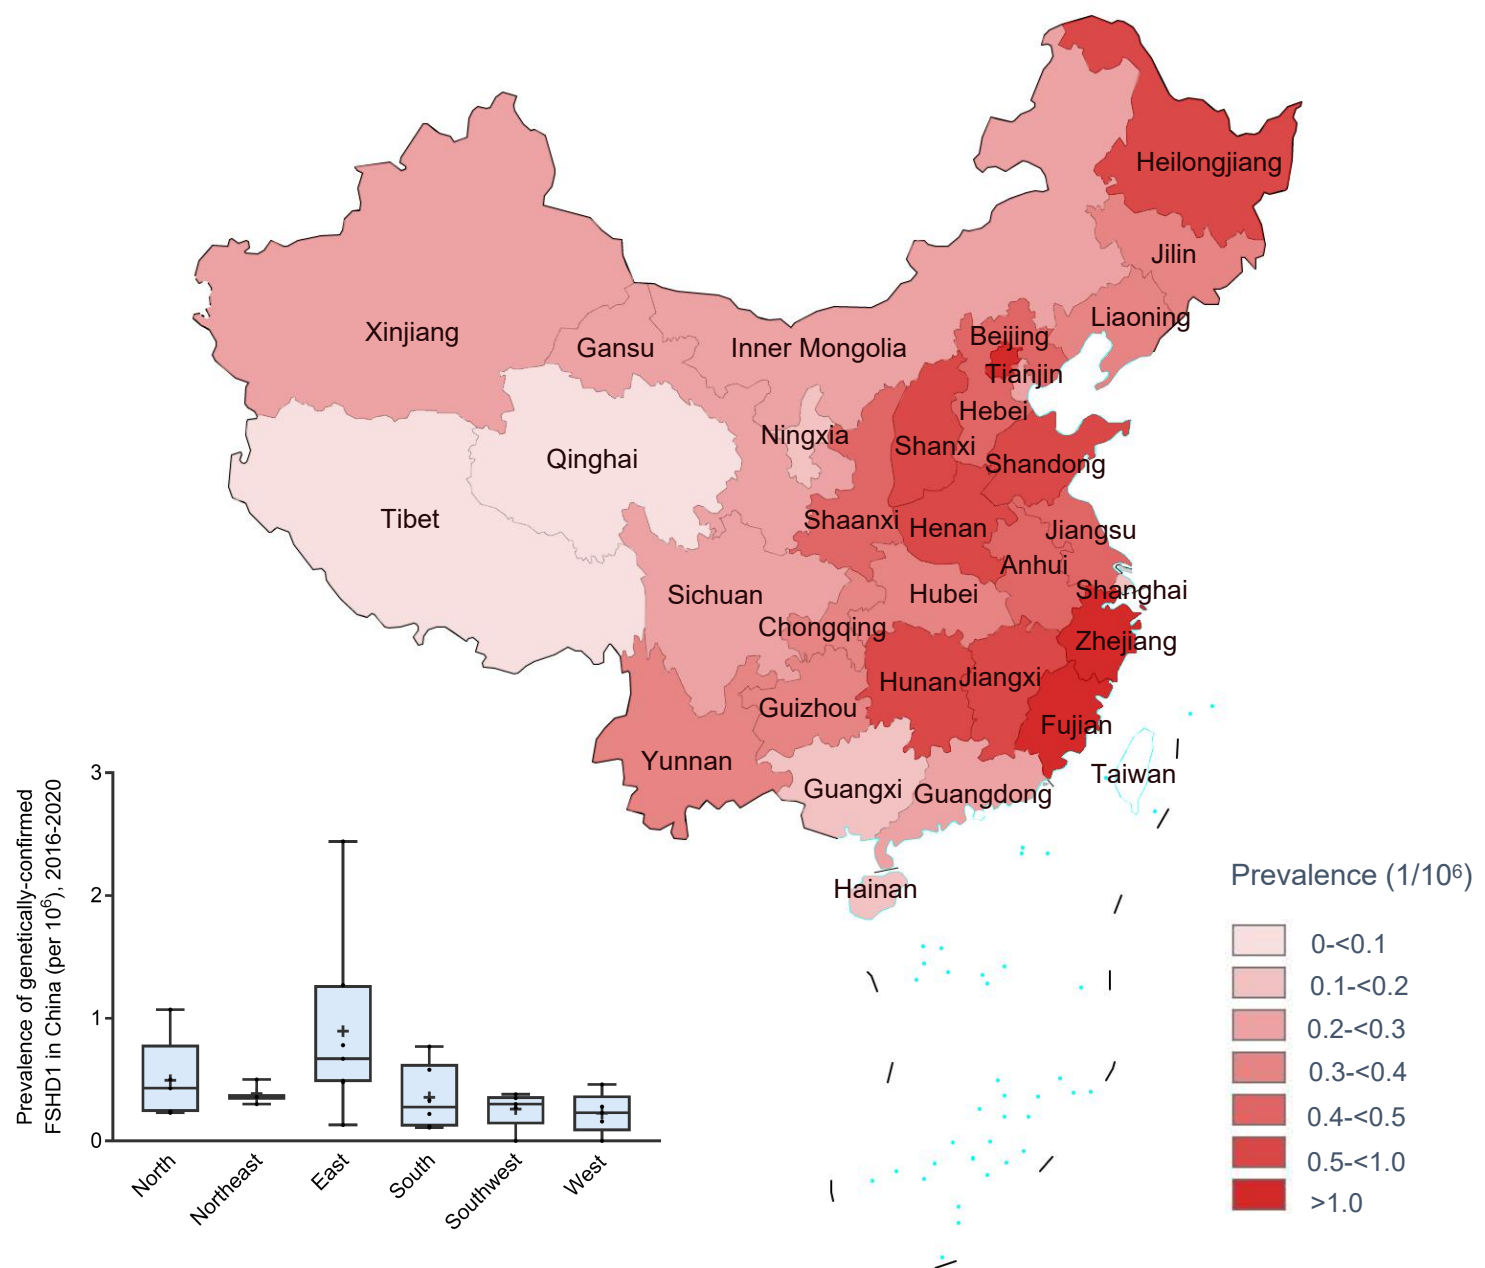

Supplement: mmc7.pdf [file mmc7.pdf]
